# Supplementary material for: Th(iv) and Ce(iv) napthylsalophen sandwich complexes: characterization of unusual thorium fluorescence in solution and solid-state
Source: Royal Society of Chemistry journal article supplement (doi:10.1039/c7cc06868a), 2017-01-01
Supplement: c7cc06868a1.pdf [file c7cc06868a1.pdf]

## Supplemental Information

# **Th(IV) and Ce(IV) Naphthylsalophen Sandwich Complexes: Characterization of Unusual Thorium Fluorescence in Solution and Solid-state**

Emily E. Hardy, Kevin M. Wyss, John D. Gorden, Isuru R. Ariyaratna,  
Evangelos Miliordos, and Anne E. V. Gorden\*

Department of Chemistry and Biochemistry, Auburn University, 179 Chemistry Building,  
Auburn, Alabama 36849, USA.

### **Table of Contents**

|                                                                   |      |
|-------------------------------------------------------------------|------|
| Experimental Details                                              | SI2  |
| Electronic Spectroscopy                                           |      |
| UV Vis Spectra                                                    | SI7  |
| Solid-state Excitation/Emission Spectra                           | SI9  |
| Solution Phase Fluorescence Spectra                               | SI10 |
| Quantum Yield Calculations                                        | SI12 |
| Crystallographic Tables                                           | SI13 |
| Computational Details                                             | SI34 |
| DFT Optimized Structures                                          | SI35 |
| TD-DFT vertical excitation energies and transition dipole moments | SI39 |
| References                                                        | SI42 |

## Experimental Details

### General considerations

*Caution! Standard precautions for handling radioactive materials or heavy metals, such as  $\text{Th}(\text{NO}_3)_4 \cdot 6\text{H}_2\text{O}$  as used in this study, were followed.*

Any solvents not specifically identified were ACS grade, purchased from EMD, and used as received without further purification. The reagents toluene (HPLC grade, BDH), dimethylsulfoxide (99%, Macron), dimethylformamide (99.9%, EMD), acetonitrile (99.5%, BDH), chloroform (99.8%, BDH), methanol (HPLC grade, EMD), 1,2-diaminobenzene (99.5%, Aldrich), 2-hydroxynaphthaldehyde (98%, Alpha Aesar), and  $\text{Th}(\text{NO}_3)_4 \cdot 6\text{H}_2\text{O}$  (99%, Fluka) were used as received without further purification. Anhydrous dichloromethane (BDH) was purchased, stored under argon, and dispensed from a solvent purification system. Triethylamine (99%, Alpha Aesar) was distilled and stored under argon until use.

**NMR Spectroscopy:**  $^1\text{H}$  NMR spectra were recorded with a Bruker AC400 spectrometer at 600 MHz.  $^{13}\text{C}$  NMR spectra were recorded with a Bruker AC400 spectrometer at 151 MHz. NMR spectroscopic data were collected using deuterated chloroform ( $\text{CDCl}_3$ ).

**X-ray Diffraction:** Suitable crystals were selected and mounted on a glass fiber using paratone-n oil and data collection was completed on a 'Bruker APEX CCD' diffractometer using Mo  $\text{K}\alpha$  radiation. The crystals were kept at 180(2) K during unit cell and data collection. SMART (v. 5.624) were used for preliminary determination of cell constants and data collection control. Determination of integrated intensities and global cell refinements were performed with the Bruker SAINT software package, and empirical absorption corrections (SADABS) were applied. The structure was solved with the ShelXS structure solution program using Direct Methods<sup>1</sup> and refined with the olex2.refine<sup>2</sup> refinement package using Gauss-Newton minimisation. Projections were created on Olex2 software.<sup>3</sup>

### Synthetic Procedures:

**L:** 1,2-diaminobenzene (0.433 g, 7.23 mmol) and 2-hydroxynaphthaldehyde (1.32 g, 15.0 mmol) were added to 150 mL of MeOH, heated to reflux temperature, and stirred for 6 hours. The solution was observed to change from yellow to orange and a precipitate formed. The solution was allowed to cool to room temperature. The resulting solid was filtered and washed with hexanes to yield an orange powder (2.54 g, 84 %).  $^1\text{H}$  NMR (600 MHz,  $\text{CDCl}_3$ )  $\delta$  7.177 (d, 2H,  $J = 9.2$  Hz), 7.343 (t, 2H,  $J = 7.4$  Hz), 7.435-7.386 (m, 4H), 7.509 (t, 2H,  $J = 8.2$  Hz), 7.730 (d, 2H,  $J = 7.9$  Hz), 7.817 (d, 2H,  $J = 9.2$  Hz), 8.137 (d, 2H,  $J = 8.5$  Hz), 9.456 (d, 2H,  $J = 3.6$  Hz), 15.076 (s, 2OH);  $^{13}\text{C}$  NMR (151 MHz,  $\text{CDCl}_3$ )  $\delta$  109.40, 119.03, 119.15, 122.09, 123.63, 127.42, 127.51, 128.08, 129.41, 133.21, 136.67, 139.73, 156.17, 169.08; TOF MS (ESI)  $m/z$  ( $\text{M}^+ + 1$ ) Calcd 417.1525, Found 417.1550.

<sup>1</sup>H NMR spectrum of L (residual acetone and water denoted by an asterisk)

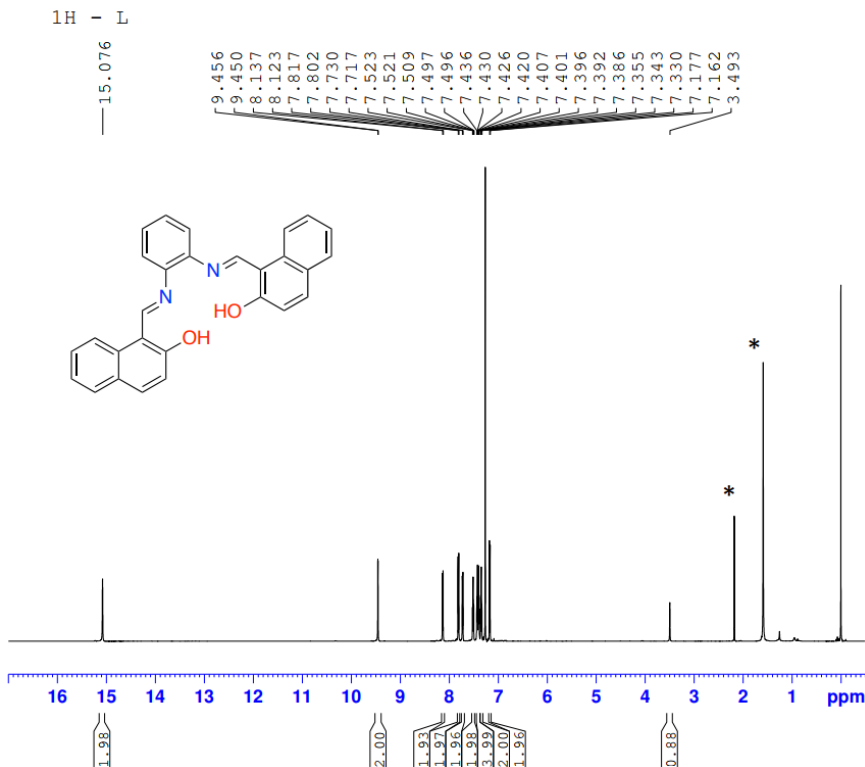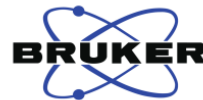

Current Data Parameters  
 NAME Emily\_RK7\_1H\_081116  
 EXPNO 10  
 PROCNO 1

F2 - Acquisition Parameters  
 Date\_ 20160811  
 Time 15.00  
 INSTRUM spect  
 PROBHD 5 mm CPTCI 1H-  
 PULPROG zg30  
 TD 65536  
 SOLVENT CDCl3  
 NS 32  
 DS 0  
 SWH 15000.000 Hz  
 FIDRES 0.228882 Hz  
 AQ 2.1845334 sec  
 RG 4  
 DW 33.333 usec  
 DE 10.00 usec  
 TE 308.2 K  
 D1 10.00000000 sec  
 TDO 1

==== CHANNEL f1 =====  
 SFO1 600.1330006 MHz  
 NUC1 1H  
 P1 9.50 usec  
 PLW1 4.90000010 W

F2 - Processing parameters  
 SI 131072  
 SF 600.1300169 MHz  
 WDW EM  
 SSB 0  
 LB 1.00 Hz  
 GB 0  
 PC 1.00

<sup>13</sup>C NMR spectrum of L:

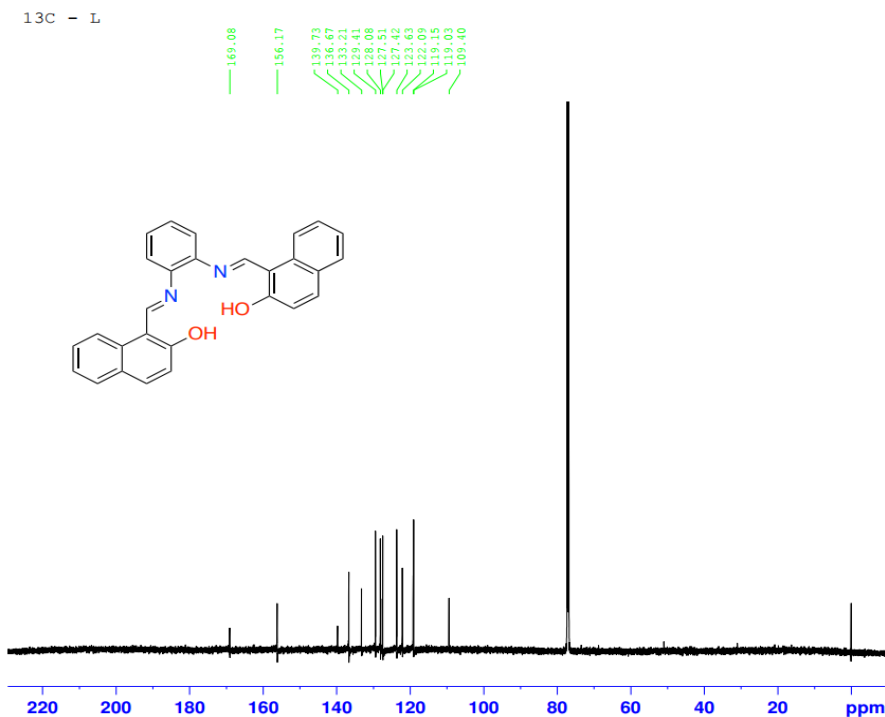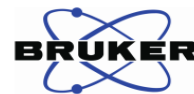

Current Data Parameters  
 NAME Emily\_RK7\_13C\_081116  
 EXPNO 10  
 PROCNO 1

F2 - Acquisition Parameters  
 Date\_ 20160811  
 Time 16.03  
 INSTRUM spect  
 PROBHD 5 mm CPTCI 1H-  
 PULPROG zgpg30  
 TD 65536  
 SOLVENT CDCl3  
 NS 1024  
 DS 4  
 SWH 36057.691 Hz  
 FIDRES 0.550197 Hz  
 AQ 0.9087659 sec  
 RG 812  
 DW 13.867 usec  
 DE 18.00 usec  
 TE 308.2 K  
 D1 2.00000000 sec  
 D11 0.03000000 sec  
 TDO 1

==== CHANNEL f1 =====  
 SFO1 150.9194083 MHz  
 NUC1 13C  
 P1 15.00 usec  
 PLW1 110.00000000 W

==== CHANNEL f2 =====  
 SFO2 600.1324005 MHz  
 NUC2 1H  
 CPDPRG2 waltz16  
 PCPD2 70.00 usec  
 PLW2 4.90000010 W  
 PLW12 0.09025000 W  
 PLW13 0.04422300 W

F2 - Processing parameters  
 SI 32768  
 SF 150.9028090 MHz  
 WDW EM  
 SSB 0  
 LB 1.00 Hz  
 GB 0  
 PC 1.40

## CeL<sub>2</sub>:

The naphthylsalophen ligand (**L**) (867 mg, 2.08 mmol) and NEt<sub>3</sub> (1.0 mL) were added to minimal amount of DCM (120 mL) and allowed to dissolve in a 250 mL round bottom flask. Ce(OAc)<sub>3</sub>•H<sub>2</sub>O (342 mg, 1.08 mmol) was then added to the flask with minimal amount (80 mL) of MeOH to dissolve the salt after some stirring. The reaction was heated to 40 °C and stirred for 6 hours. The solution volume was reduced by half by rotary evaporation, and the precipitate, a reddish brown solid, was filtered off and collected. Crystals suitable for x-ray diffraction were grown in five days from layering a saturated toluene solution of CeL<sub>2</sub> with hexanes. (976 mg, 94 %).

<sup>1</sup>H NMR (600 MHz, CDCl<sub>3</sub>) δ 6.328 (d, 4H, *J* = 9.0 Hz), 7.254-7.269 (m, 4H), 7.303-7.350 (m, 8H), 7.533 (s, 4H), 7.547 (s, 4H), 7.733 (d, 4H, *J* = 7.7 Hz), 7.968 (d, 4H, *J* = 8.4 Hz), 9.628 (s, 4H) ppm; <sup>13</sup>C NMR (151 MHz, CDCl<sub>3</sub>) δ 114.27, 118.80, 120.09, 122.55, 122.94, 127.15, 127.20, 127.83, 128.88, 133.81, 134.77, 146.74, 156.11, 168.82 ppm; TOF MS (ESI) *m/z* (*M*<sup>+</sup> + 1) Calcd 969.1791, Found 969.1705.

<sup>1</sup>H NMR spectrum of CeL<sub>2</sub> (residual water and acetone are denoted by an asterisk):

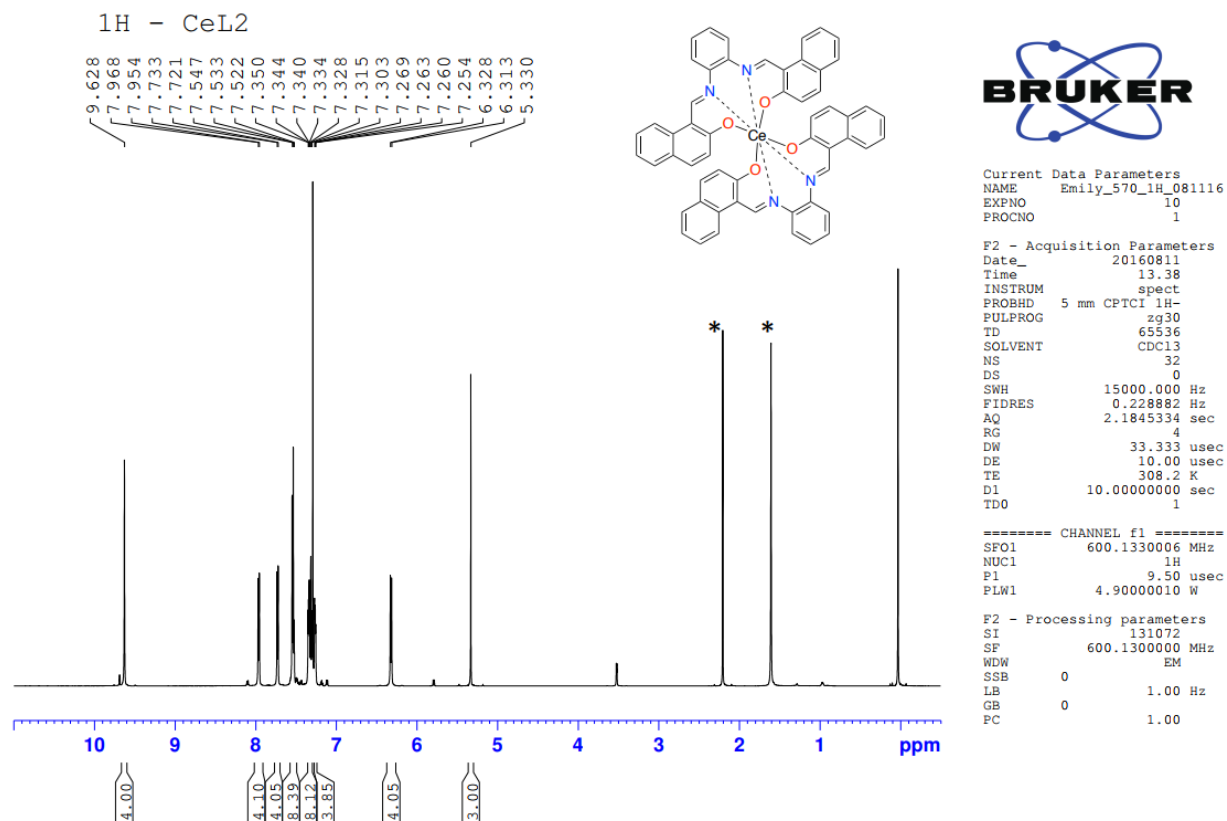

## <sup>13</sup>C NMR spectrum of CeL<sub>2</sub>:

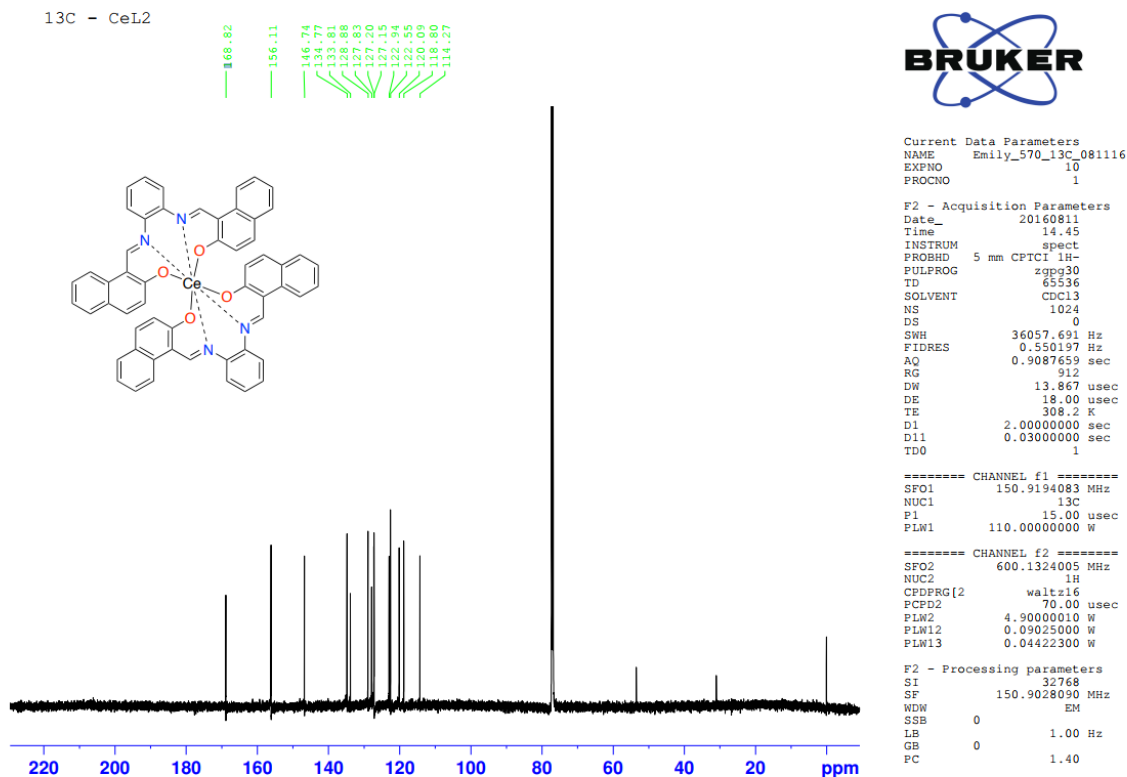

ThL<sub>2</sub>: The naphthylsalophen ligand (**L**) (414 mg, 0.995 mmol) and NEt<sub>3</sub> (1.0 mL) were added to 100 mL of DCM and 50 mL of MeOH in a 250 mL round bottom flask. The mixture was stirred until all the solids were dissolved. Thorium nitrate (214 mg, 0.415 mmol) was then added to the flask. The reaction was heated to 40 °C and heated with stirring for 5.5 hours. The solution volume was reduced by half by rotary evaporation, and subsequently put in ice for 30 minutes. A yellow solid precipitated. This was filtered off and rinsed with hexanes (333 mg, 76 %). Crystals suitable for x-ray diffraction were grown in 3 days from layering a saturated toluene solution of ThL<sub>2</sub> with hexanes. <sup>1</sup>H NMR (600 MHz, CDCl<sub>3</sub>) δ 6.525 (d, 4H, *J* = 9.0 Hz), 7.150 (s, 4H), 7.272 (t, 4H, *J* = 7.2 Hz), 7.458 (t, 4H, *J* = 7.2 Hz), 7.560 (d, 4H, *J* = 9.0 Hz), 7.671 (d, 4H, *J* = 7.8 Hz), 7.937 (d, 4H, *J* = 8.4 Hz), 9.296 (s, 4H) ppm; <sup>13</sup>C NMR (151 MHz, CDCl<sub>3</sub>) δ 113.73, 119.62, 119.67, 122.78, 124.44, 127.43, 127.47, 127.53, 129.27, 134.54, 136.00, 145.93, 158.68, 167.15 ppm; TOF MS (ESI) *m/z* (*M*<sup>+</sup> + 1) Calcd 1061.3195, Found 1061.3199.

<sup>1</sup>H NMR spectrum of ThL2 (residual water denoted with an asterisk):

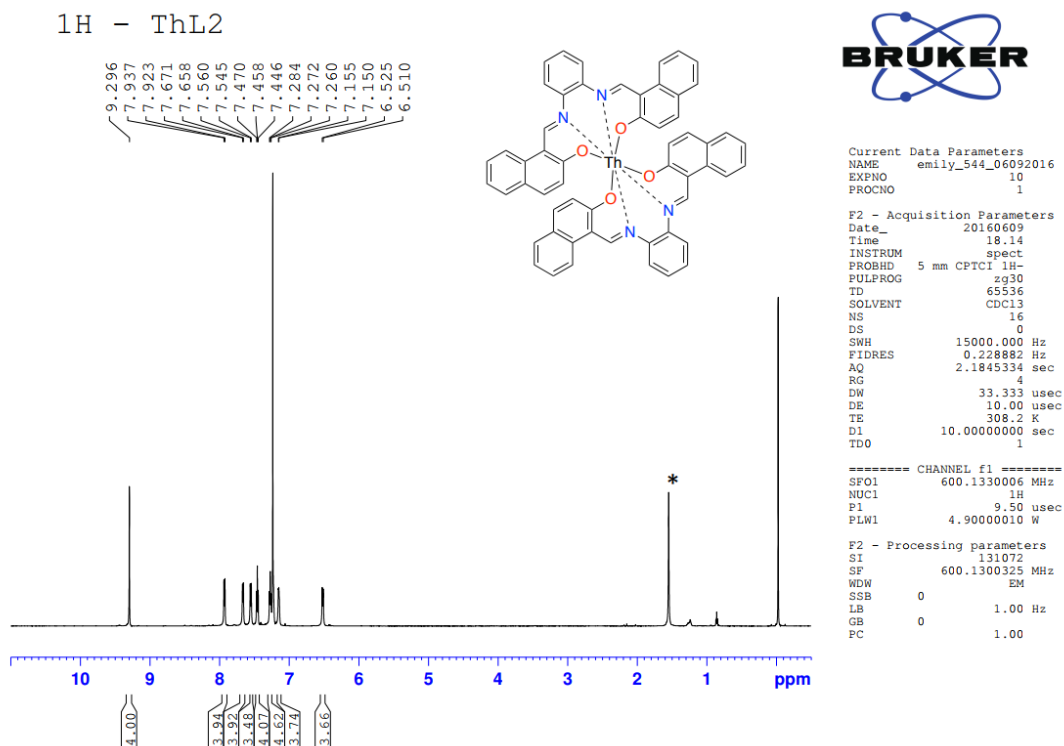

<sup>13</sup>C NMR Spectrum of ThL2:

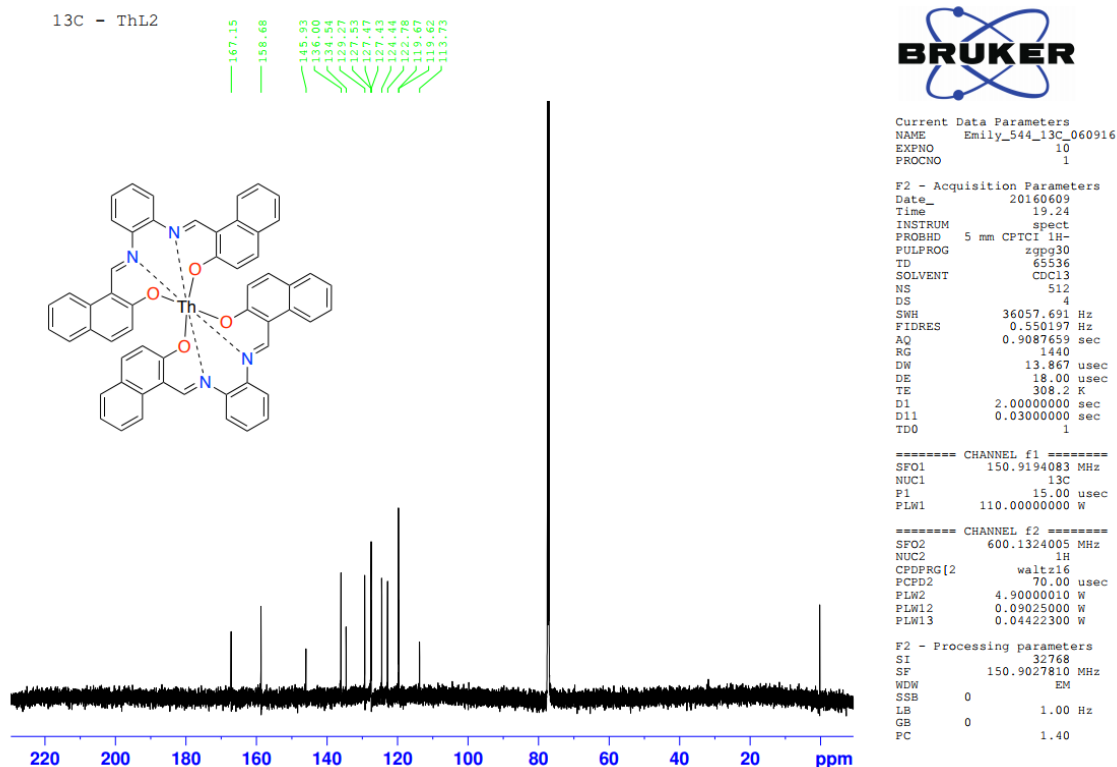

## Electronic Spectroscopy

**Absorbance Spectroscopy:** All solution phase absorbance spectra were collected on a VARIAN Cary 50 WinUV Spectrometer with a xenon lamp with absorbance spectra from 200 nm to 900 nm with a 1 cm width quartz cuvette. Solid-state absorbance spectra were collected on a 20/20 PV CRAIC microspectrophotometer with a xenon lamp for transmission/absorbance measurements, with optimized exposure times from single crystals of each respective complex.

**Fluorescence Spectroscopy:** All solution phase fluorescence spectra were collected on a Shimadzu RF-5301 PC fluorospectrophotometer with a xenon lamp and a 1 cm width quartz cuvette with an excitation of 365 nm and an emission spectrum of 375–900 nm. Slit widths were set so that the maximum emission of the ligand could be seen, and held constant throughout. Solid-state fluorescence spectra were collected on a 20/20 PV CRAIC microspectrophotometer with a mercury lamp for fluorescence measurements. Samples were excited with 365 nm light with optimized exposure times from single crystals of each respective complex.

## Thorium Titration Procedure

Serial titrations of  $\text{ThL}_2$  was completed by introducing a known amount  $\text{Th}(\text{NO}_3)_2$  to a solution of free base in methanol. Solutions were 2.0 mL of 31  $\mu\text{M}$  ligand, and 1/10 equivalent of metal salt were added per addition (12  $\mu\text{L}$  additions). The solutions were shaken for 3 seconds, replaced in the spectrometer, and the UV-vis spectrum was collected.

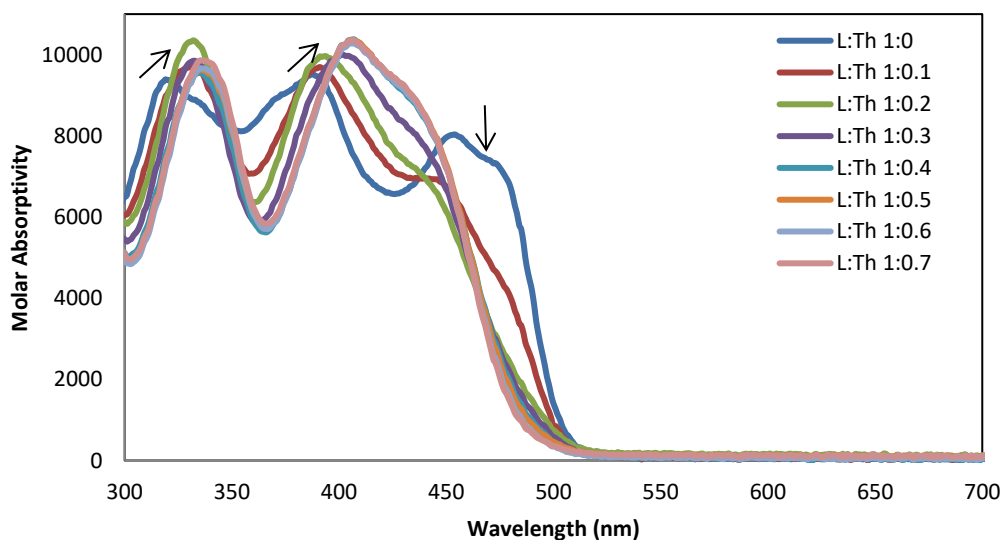

**Figure S11:** Solution phase absorbance of L ( $\lambda_{\text{max}}=324, 394, \text{ and } 446 \text{ nm}$ ) with increasing  $[\text{Th}^{4+}]$  to form  $\text{ThL}_2$  ( $\lambda_{\text{max}}=342, \text{ and } 411 \text{ nm}$  with a shoulder at 440 nm).

## Cerium UV Procedure

The oxidation of Ce(III) to Ce(IV) was observed spectrophotometrically by adding 1 equivalent of Ce(III) acetate to a 31  $\mu\text{M}$  solution of free base in dimethylformamide. One equivalent of metal salt was added (120  $\mu\text{L}$ ). The solution was then heated and a UV-visible spectra was recorded every two minutes for 36 minutes. The charge transfer band of the CeL<sub>2</sub> solution was observed to grown in slowly, after heating and exposure to oxygen in a mildly basic solvent.

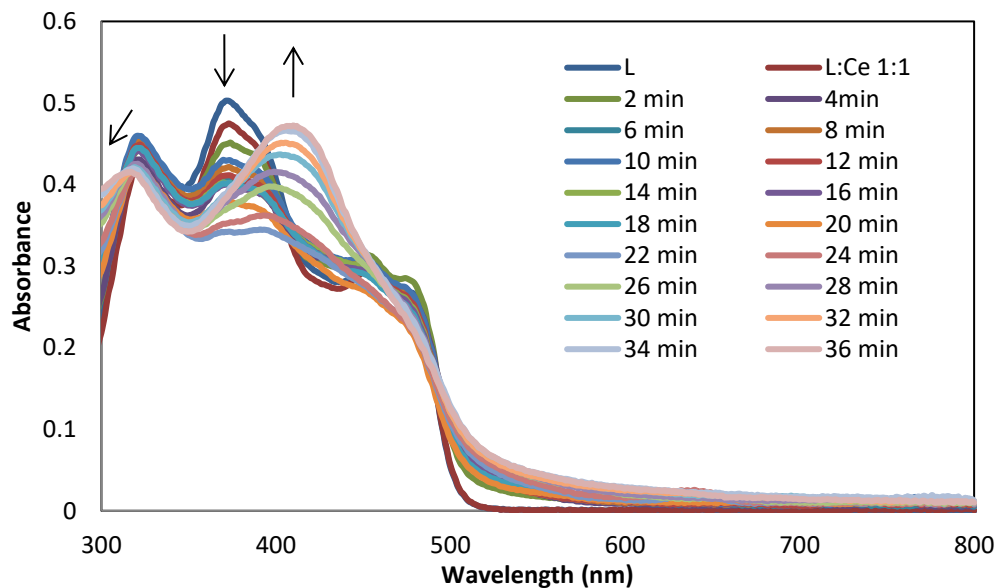

**Figure S12:** Solution phase absorbance of L ( $\lambda_{\text{max}}=324, 394, \text{ and } 446 \text{ nm}$ ) and spectrophotometric observation of the formation of Ce(IV)L<sub>2</sub> ( $\lambda_{\text{max}}=317, \text{ and } 417 \text{ nm}$ ).



### Solid-State Excitation and Emission Spectra

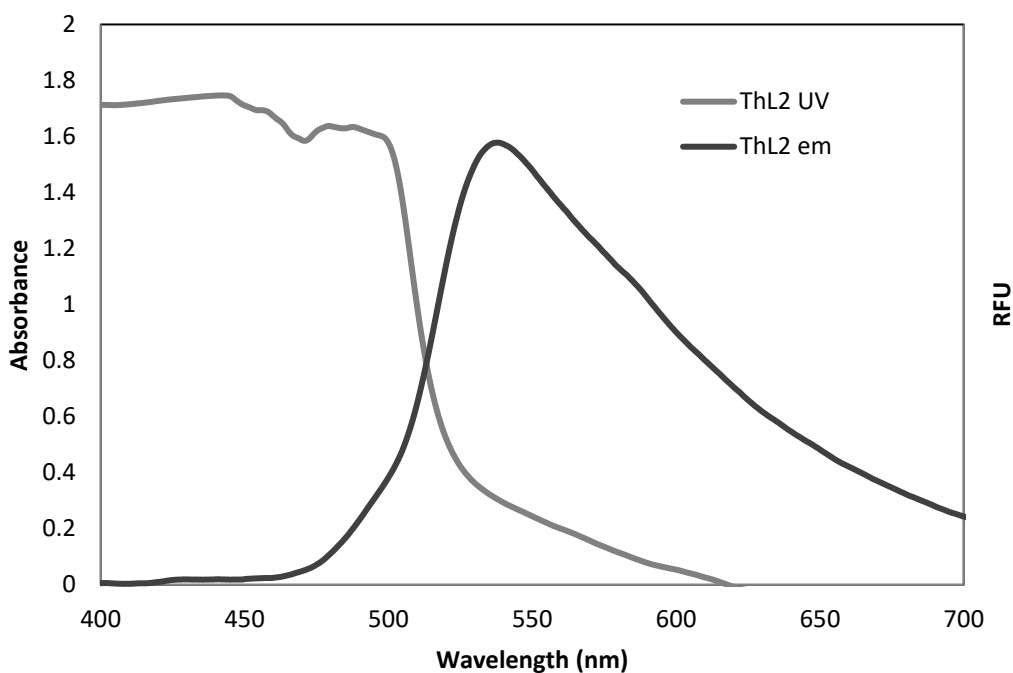

**Figure SI3:** Solid-state absorbance and emission spectra with excitation at 365 nm of ThL<sub>2</sub>. An absorbance peak centered at 488 nm and an emission peak at 537 nm are observed.

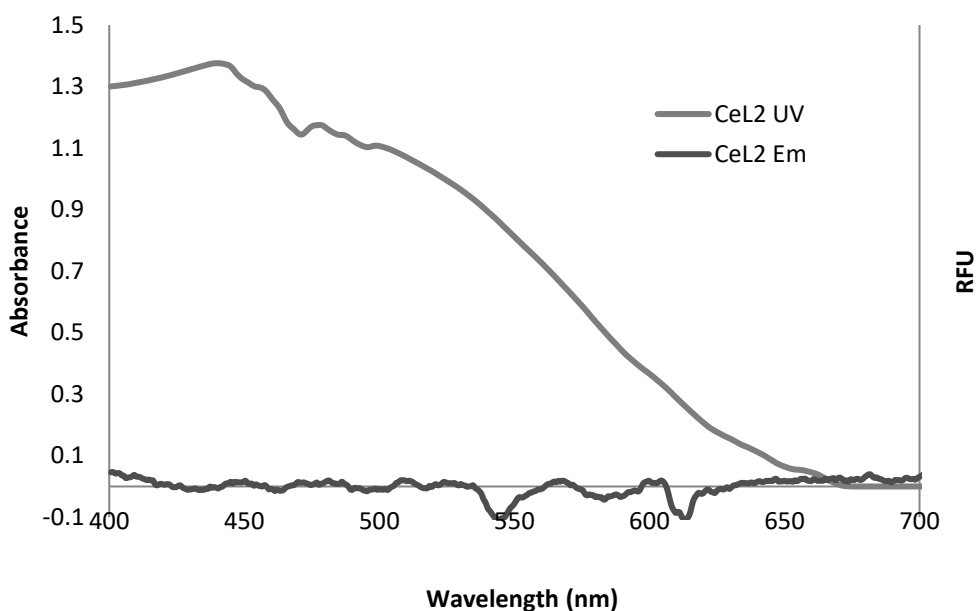

**Figure SI4:** Solid-state absorbance and emission spectra with excitation at 365 nm of CeL<sub>2</sub>. Broad absorbance peak is observed, but all emission is quenched.

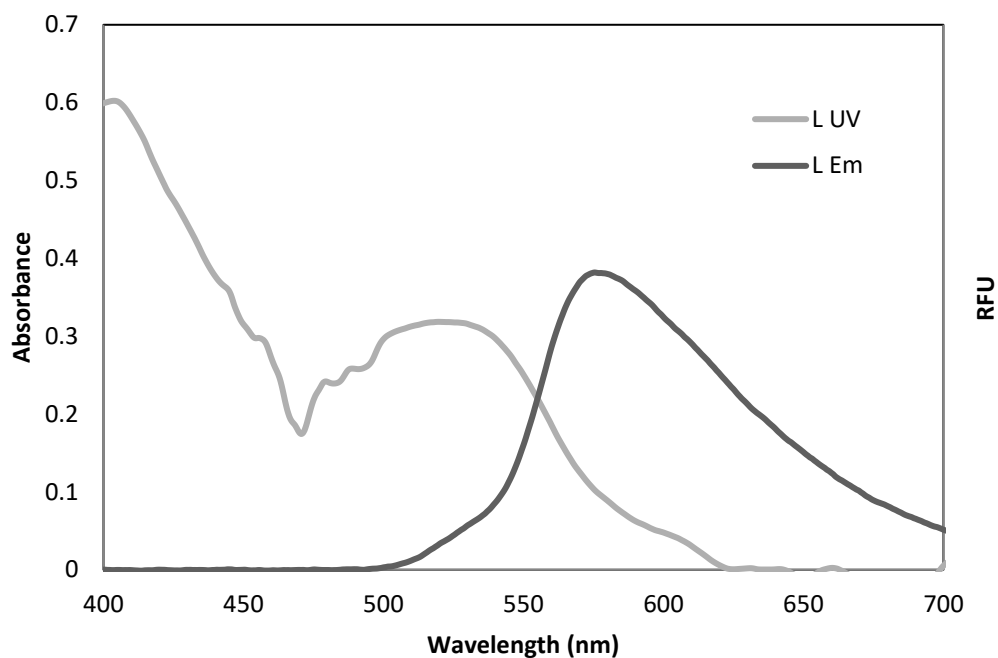

**Figure SI5:** Solid-state absorbance and emission spectra with excitation at 365 nm of L. An absorbance peak at 520 nm and an emission peak at 575 nm are observed.

### Solution phase Excitation and Emission Spectra

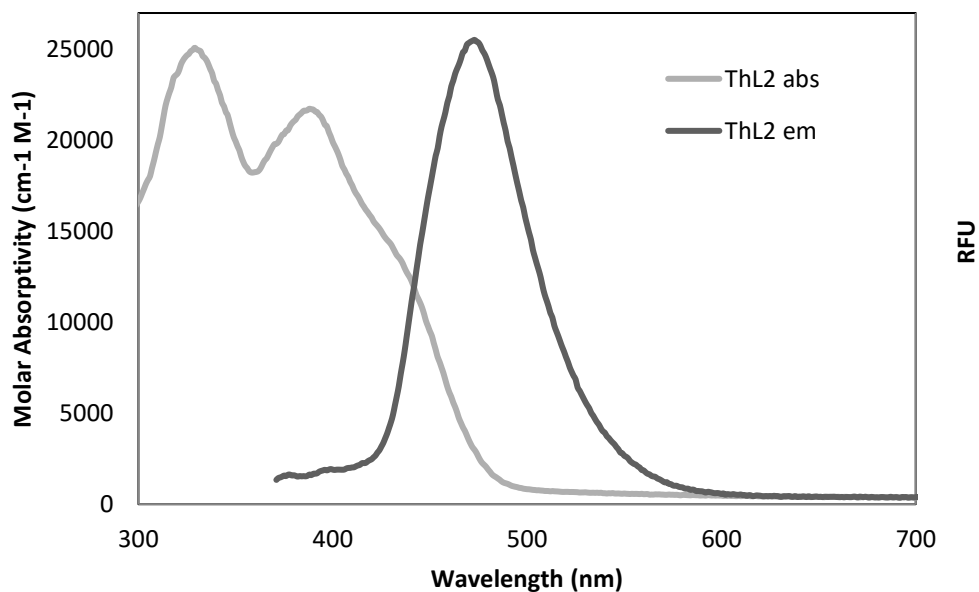

**Figure SI6:** Solution phase absorbance and emission spectra of ThL<sub>2</sub> in acetonitrile with excitation at 365 nm. Two absorbance peaks at 333 nm and 391 nm, with a shoulder centered on 440 nm are observed, with an emission peak at 473 nm.

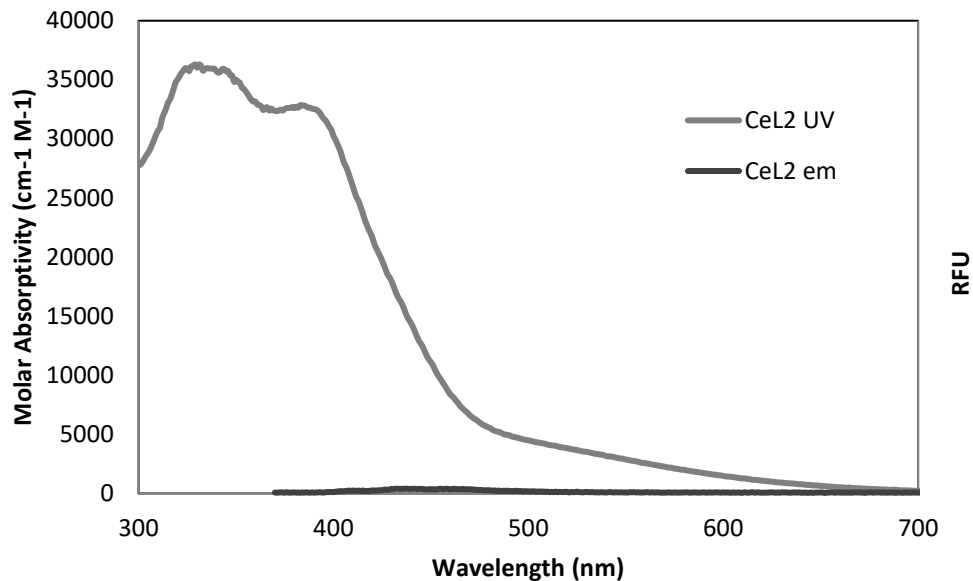

**Figure SI7:** Solution phase absorbance and emission spectra of CeL<sub>2</sub> in dichloromethane with excitation at 365 nm. Two absorbance peaks at 335 nm and 387 nm, with a shoulder centered on 440 nm are observed, all emission is quenched.

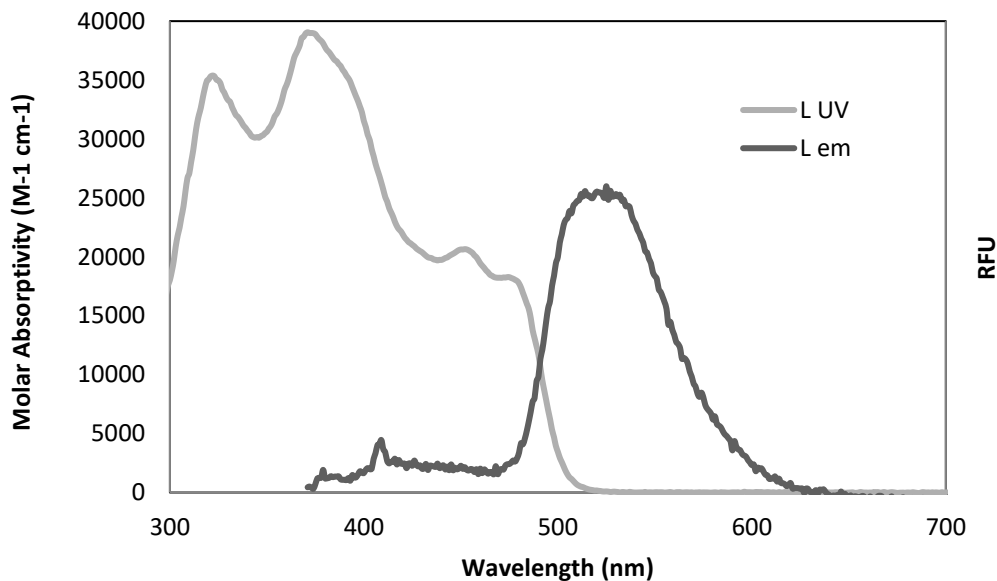

**Figure SI8:** Solution phase absorbance and emission spectra of ThL<sub>2</sub> in acetonitrile with excitation at 365 nm of. Four absorbance peaks at 326 nm, 375 nm, 456, and 476 nm are observed, with an emission peak at 517 nm.

## Quantum Yield Calculations

Quantum Yields in **Table 1** were calculated via equation 1,

$$\Phi_X = \Phi_{ST} \left( \frac{\text{Slope}_X}{\text{Slope}_{ST}} \right) \left( \frac{\eta_X^2}{\eta_{ST}^2} \right) \quad (1)$$

Where the subscripts ST and X denote standard (anthracene) and unknown (ThL<sub>2</sub>) respectively,  $\Phi_X$  is the fluorescence quantum yield, Slope is the slope from the plot of fluorescence intensity vs absorbance, and  $\eta$  the refractive index of the solvent. In this case the solvent for the standard was methanol and the solvent for the samples were variable, and  $\Phi_{ST}$  was equal to 24 %.<sup>5</sup>

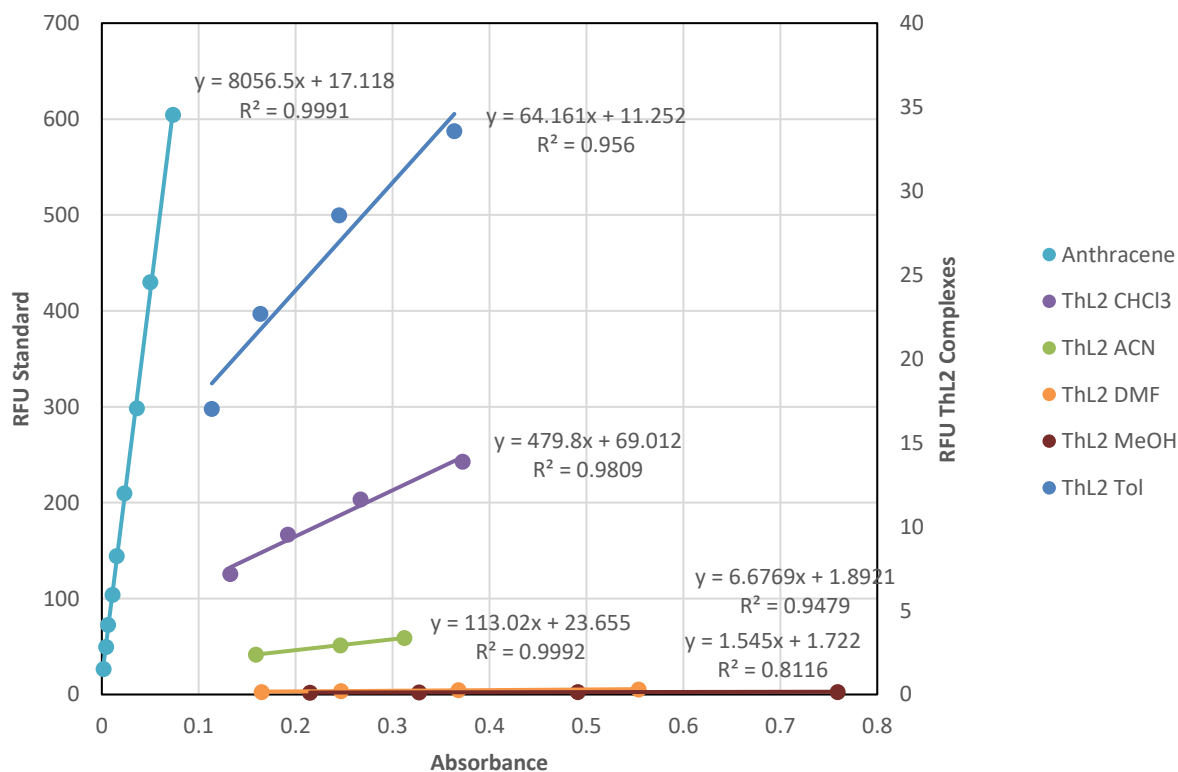

**Figure S19:** ThL<sub>2</sub> fluorescence after excitation at 365 nm vs. absorbance value at 365 nm of 31.2, 21.8, 14.5, 9.7  $\mu$ M solutions in indicated solvent and anthracene fluorescence after excitation at 365 nm vs. absorbance value at 365 nm of 35.7, 23.8, 15.8, 10.6, 7.1, 4.7, 3.1, 2.0, 1.0  $\mu$ M solutions in methanol.

## Crystallographic Tables

### ThL2\_FINAL

**Table 1** Crystal data and structure refinement for ThL2\_FINAL

|                                             |                                                                      |
|---------------------------------------------|----------------------------------------------------------------------|
| Identification code                         | ThL2_FINAL                                                           |
| Empirical formula                           | C <sub>66.5</sub> H <sub>47.5</sub> N <sub>4</sub> O <sub>4</sub> Th |
| Formula weight                              | 1198.68                                                              |
| Temperature/K                               | 180.45                                                               |
| Crystal system                              | triclinic                                                            |
| Space group                                 | P-1                                                                  |
| a/Å                                         | 11.4987(3)                                                           |
| b/Å                                         | 14.3613(4)                                                           |
| c/Å                                         | 16.2765(5)                                                           |
| α/°                                         | 106.2205(11)                                                         |
| β/°                                         | 90.8258(11)                                                          |
| γ/°                                         | 94.1516(11)                                                          |
| Volume/Å <sup>3</sup>                       | 2572.39(13)                                                          |
| Z                                           | 2                                                                    |
| ρ <sub>calc</sub> /mg/mm <sup>3</sup>       | 1.5474                                                               |
| m/mm <sup>-1</sup>                          | 2.955                                                                |
| F(000)                                      | 1180.2                                                               |
| Crystal size/mm <sup>3</sup>                | 0.18 × 0.12 × 0.08                                                   |
| Radiation                                   | Mo Kα (λ = 0.71073)                                                  |
| 2θ range for data collection                | 2.6 to 48.22°                                                        |
| Index ranges                                | -13 ≤ h ≤ 13, -16 ≤ k ≤ 16, -18 ≤ l ≤ 18                             |
| Reflections collected                       | 53501                                                                |
| Independent reflections                     | 8180 [R <sub>int</sub> = 0.0498, R <sub>sigma</sub> = 0.0396]        |
| Data/restraints/parameters                  | 8180/3/686                                                           |
| Goodness-of-fit on F <sup>2</sup>           | 1.060                                                                |
| Final R indexes [I >= 2σ (I)]               | R <sub>1</sub> = 0.0242, wR <sub>2</sub> = 0.0489                    |
| Final R indexes [all data]                  | R <sub>1</sub> = 0.0330, wR <sub>2</sub> = 0.0516                    |
| Largest diff. peak/hole / e Å <sup>-3</sup> | 0.92/-0.91                                                           |

**Table 2** Fractional Atomic Coordinates ( $\times 10^4$ ) and Equivalent Isotropic Displacement Parameters ( $\text{\AA}^2 \times 10^3$ ) for ThL2\_FINAL.  $U_{\text{eq}}$  is defined as 1/3 of the trace of the orthogonalised  $U_{\text{ij}}$  tensor.

| Atom | x          | y           | z          | U(eq)    |
|------|------------|-------------|------------|----------|
| Th1  | 105.71(10) | 5047.97(10) | 2558.78(8) | 18.78(5) |
| O1   | -621.3(17) | 5380.9(16)  | 1388.0(13) | 21.4(5)  |
| O3   | 207.8(18)  | 5808.6(16)  | 3993.1(13) | 22.8(5)  |
| O4   | 1803.9(18) | 4430.9(17)  | 2831.8(14) | 28.0(6)  |
| N3   | 399(2)     | 6951(2)     | 2905.6(16) | 18.6(6)  |
| N4   | 1928(2)    | 5814(2)     | 1950.7(16) | 18.8(6)  |
| N2   | -1484(2)   | 4086(2)     | 3193.3(16) | 18.5(6)  |
| N1   | -1985(2)   | 5709.5(19)  | 2808.4(16) | 17.9(6)  |
| O2   | -246.0(19) | 3440.0(18)  | 1737.1(14) | 28.9(6)  |
| C40  | 890(3)     | 7271(2)     | 2228(2)    | 19.2(8)  |
| C19  | -1227(3)   | 2380(2)     | 2444(2)    | 22.0(8)  |
| C10  | -2247(3)   | 6345(2)     | 1563(2)    | 19.7(8)  |
| C45  | 1692(3)    | 6681(2)     | 1726(2)    | 20.6(8)  |
| C48  | 4540(3)    | 4377(2)     | 1675.8(19) | 18.2(8)  |
| C12  | -2506(3)   | 5541(2)     | 3549.0(19) | 17.4(8)  |
| C11  | -2588(3)   | 6117(2)     | 2344(2)    | 19.9(8)  |
| C2   | -1056(3)   | 6097(2)     | 302(2)     | 24.7(8)  |
| C9   | -3009(3)   | 6884(2)     | 1186(2)    | 20.8(8)  |
| C16  | -2592(3)   | 4539(3)     | 4525(2)    | 24.5(8)  |
| C4   | -2758(3)   | 7004(2)     | 368(2)     | 24.8(8)  |
| C20  | -1533(3)   | 1392(2)     | 2472(2)    | 24.2(8)  |
| C27  | -348(3)    | 1748(3)     | 1072(2)    | 34.8(10) |
| C29  | -178(3)    | 6562(3)     | 4549(2)    | 22.2(8)  |
| C17  | -2208(3)   | 4717(2)     | 3771(2)    | 19.0(8)  |
| C56  | 2837(3)    | 4204(3)     | 2534(2)    | 24.0(8)  |
| C13  | -3240(3)   | 6165(3)     | 4075(2)    | 26.8(9)  |
| C31  | -806(3)    | 7235(3)     | 5994(2)    | 31.7(10) |
| C1   | -1287(3)   | 5941(2)     | 1111(2)    | 18.7(8)  |
| C53  | 5055(3)    | 3642(3)     | 1945(2)    | 24.3(8)  |
| C41  | 600(3)     | 8106(3)     | 2019(2)    | 26.2(9)  |
| C47  | 3411(3)    | 4683(2)     | 2000(2)    | 19.7(8)  |
| C3   | -1760(3)   | 6609(2)     | -48(2)     | 28.0(9)  |
| C39  | 97(3)      | 7608(3)     | 3584(2)    | 22.5(8)  |
| C50  | 6196(3)    | 4433(2)     | 773(2)     | 25.7(9)  |

|      |          |         |            |          |
|------|----------|---------|------------|----------|
| C8   | -4024(3) | 7291(2) | 1572(2)    | 29.3(9)  |
| C49  | 5137(3)  | 4750(2) | 1062(2)    | 23.6(8)  |
| C54  | 4446(3)  | 3211(3) | 2516(2)    | 31.0(9)  |
| C51  | 6724(3)  | 3733(3) | 1068(2)    | 29.4(9)  |
| C28  | -587(3)  | 2559(3) | 1769(2)    | 25.4(9)  |
| C44  | 2168(3)  | 6944(3) | 1042(2)    | 26.3(9)  |
| C18  | -1714(3) | 3159(3) | 3054(2)    | 20.5(8)  |
| C38  | -335(3)  | 7442(2) | 4361(2)    | 20.2(8)  |
| C37  | -811(3)  | 8231(3) | 4995(2)    | 25.3(9)  |
| C46  | 2965(3)  | 5519(2) | 1817.4(19) | 19.1(8)  |
| C15  | -3328(3) | 5161(3) | 5029(2)    | 33.9(10) |
| C32  | -1016(3) | 8128(3) | 5827(2)    | 27.4(9)  |
| C52  | 6149(3)  | 3336(3) | 1632(2)    | 29.0(9)  |
| C55  | 3384(3)  | 3468(3) | 2796(2)    | 28.0(9)  |
| C25  | -1285(3) | 609(3)  | 1763(2)    | 30.7(9)  |
| C35  | -1566(3) | 9826(3) | 5458(3)    | 41(1)    |
| C21  | -2047(3) | 1164(3) | 3174(2)    | 34.7(10) |
| C30  | -424(3)  | 6480(3) | 5384(2)    | 27.2(9)  |
| C43  | 1899(3)  | 7787(3) | 855(2)     | 32.5(9)  |
| C24  | -1626(3) | -351(3) | 1772(3)    | 40.9(11) |
| C36  | -1124(3) | 9090(3) | 4833(2)    | 33.6(9)  |
| C5   | -3507(3) | 7510(3) | -21(2)     | 33.8(10) |
| C42  | 1106(3)  | 8369(3) | 1343(2)    | 30.5(9)  |
| C14  | -3659(3) | 5958(3) | 4801(2)    | 33.7(9)  |
| C22  | -2345(3) | 217(3)  | 3162(3)    | 43.7(11) |
| C33  | -1448(3) | 8894(3) | 6459(2)    | 40.3(11) |
| C26  | -700(3)  | 826(3)  | 1072(2)    | 39.8(10) |
| C7   | -4732(3) | 7771(3) | 1169(3)    | 35.5(10) |
| C34  | -1714(3) | 9725(3) | 6279(3)    | 45.4(12) |
| C6   | -4473(3) | 7868(3) | 364(3)     | 37.5(10) |
| C23  | -2153(3) | -542(3) | 2459(3)    | 44.6(11) |
| C58S | 4787(4)  | 8330(3) | 5026(3)    | 50.8(12) |
| C59S | 3832(4)  | 7670(3) | 4740(3)    | 65.3(14) |
| C63S | 5255(4)  | 8778(4) | 4452(3)    | 64.5(14) |
| C62S | 4763(5)  | 8614(4) | 3643(3)    | 73.7(16) |
| C57S | 5301(5)  | 8528(4) | 5915(3)    | 81.7(17) |
| C60S | 3348(4)  | 7486(4) | 3946(4)    | 83.7(18) |
| C61S | 3809(5)  | 7978(4) | 3390(3)    | 77.3(16) |

|      |           |          |         |        |
|------|-----------|----------|---------|--------|
| C66S | -6167(6)  | 9853(5)  | -21(7)  | 105(3) |
| C64S | -6210(14) | 10433(9) | 1544(8) | 136(6) |
| C67S | -5552(9)  | 9616(5)  | -796(6) | 111(3) |
| C65S | -5610(8)  | 10226(5) | 764(6)  | 104(2) |

**Table 3** Anisotropic Displacement Parameters ( $\text{\AA}^2 \times 10^3$ ) for ThL2\_FINAL. The Anisotropic displacement factor exponent takes the form:  $-2\pi^2[h^2a^{*2}U_{11}+2hka^*b^*U_{12}+\dots]$

| Atom | U <sub>11</sub> | U <sub>22</sub> | U <sub>33</sub> | U <sub>12</sub> | U <sub>13</sub> | U <sub>23</sub> |
|------|-----------------|-----------------|-----------------|-----------------|-----------------|-----------------|
| Th1  | 17.92(8)        | 22.71(8)        | 19.14(8)        | 5.72(5)         | 5.11(5)         | 10.30(6)        |
| O1   | 19.7(12)        | 29.6(15)        | 18.0(12)        | 8.4(11)         | 4(1)            | 10.2(11)        |
| O3   | 26.7(13)        | 26.3(15)        | 18.6(12)        | 5.3(11)         | 3.4(10)         | 10.4(11)        |
| O4   | 21.2(13)        | 38.8(16)        | 34.3(14)        | 14.7(12)        | 9.4(11)         | 23.6(13)        |
| N3   | 15.6(14)        | 23.7(18)        | 18.2(15)        | 3.8(13)         | 5.2(12)         | 7.9(14)         |
| N4   | 18.7(15)        | 21.5(17)        | 18.6(15)        | 5.8(13)         | 3.3(12)         | 8.2(13)         |
| N2   | 17.9(15)        | 20.4(18)        | 19.7(15)        | 3.7(13)         | 1.4(12)         | 9.4(13)         |
| N1   | 16.7(14)        | 19.3(16)        | 19.0(15)        | 3.6(12)         | 6.2(12)         | 6.9(13)         |
| O2   | 35.3(14)        | 26.2(16)        | 26.7(14)        | 3.7(12)         | 11.7(11)        | 9.1(12)         |
| C40  | 19.2(18)        | 16(2)           | 21.5(19)        | 0.3(15)         | 1.6(15)         | 4.8(16)         |
| C19  | 21.5(19)        | 21(2)           | 23(2)           | 4.3(16)         | -3.0(16)        | 5.8(17)         |
| C10  | 19.6(18)        | 19(2)           | 20.8(19)        | 1.8(15)         | -1.4(15)        | 6.1(16)         |
| C45  | 18.8(18)        | 23(2)           | 22.6(19)        | 6.4(16)         | 5.1(15)         | 9.6(17)         |
| C48  | 15.1(17)        | 19(2)           | 18.1(18)        | 2.0(15)         | 0.3(15)         | 1.5(16)         |
| C12  | 13.8(17)        | 20(2)           | 19.1(18)        | 1.9(15)         | 2.3(14)         | 5.5(16)         |
| C11  | 19.5(18)        | 16(2)           | 23.3(19)        | 2.9(15)         | 3.2(16)         | 3.9(16)         |
| C2   | 28(2)           | 26(2)           | 20.3(19)        | 2.5(17)         | 4.1(16)         | 6.0(17)         |
| C9   | 22.7(19)        | 15(2)           | 25(2)           | -1.0(15)        | -5.6(16)        | 6.6(16)         |
| C16  | 29(2)           | 24(2)           | 23.7(19)        | 3.4(17)         | 9.2(16)         | 11.4(17)        |
| C4   | 31(2)           | 18(2)           | 25(2)           | -2.2(17)        | -6.2(17)        | 7.1(17)         |
| C20  | 20.5(19)        | 22(2)           | 30(2)           | 2.0(16)         | -5.4(16)        | 8.2(18)         |
| C27  | 43(2)           | 28(2)           | 33(2)           | 6.6(19)         | 10.4(19)        | 6.2(19)         |
| C29  | 14.7(18)        | 34(2)           | 16.9(19)        | -0.1(16)        | -0.4(15)        | 5.1(17)         |
| C17  | 15.4(17)        | 20(2)           | 19.3(18)        | 1.8(15)         | 4.9(15)         | 2.2(16)         |
| C56  | 18.4(19)        | 31(2)           | 24(2)           | 4.8(16)         | -0.5(16)        | 8.4(17)         |
| C13  | 26(2)           | 30(2)           | 27(2)           | 11.5(17)        | 8.1(17)         | 10.2(18)        |
| C31  | 19.4(19)        | 58(3)           | 17(2)           | 1.6(19)         | 2.5(16)         | 10(2)           |
| C1   | 22.3(19)        | 16.3(19)        | 16.6(18)        | -1.2(15)        | -3.6(15)        | 4.1(15)         |
| C53  | 22.3(19)        | 30(2)           | 19.5(19)        | 5.3(17)         | -2.4(16)        | 4.4(17)         |
| C41  | 28(2)           | 26(2)           | 27(2)           | 8.9(17)         | 10.1(17)        | 9.0(17)         |



|      |          |       |          |          |          |          |
|------|----------|-------|----------|----------|----------|----------|
| C47  | 18.2(18) | 24(2) | 17.7(18) | 5.2(15)  | 0.1(15)  | 5.6(16)  |
| C3   | 40(2)    | 26(2) | 21(2)    | -2.5(18) | -4.5(18) | 11.0(17) |
| C39  | 19.4(18) | 20(2) | 29(2)    | 2.3(16)  | 0.0(16)  | 8.0(18)  |
| C50  | 20.8(19) | 28(2) | 23(2)    | -1.7(17) | 5.3(16)  | 0.0(17)  |
| C8   | 30(2)    | 25(2) | 37(2)    | 4.7(17)  | -1.7(18) | 13.7(18) |
| C49  | 21.8(19) | 23(2) | 24.9(19) | 3.7(16)  | 2.2(16)  | 3.7(16)  |
| C54  | 30(2)    | 37(2) | 33(2)    | 17.6(18) | 0.0(18)  | 18.8(19) |
| C51  | 17.5(19) | 39(2) | 25(2)    | 8.3(18)  | 1.7(16)  | -2.3(19) |
| C28  | 25(2)    | 27(2) | 23(2)    | 7.1(17)  | -0.3(17) | 4.2(18)  |
| C44  | 27(2)    | 32(2) | 24(2)    | 13.6(17) | 13.4(16) | 11.5(18) |
| C18  | 19.1(18) | 26(2) | 18.7(19) | 0.3(16)  | 1.3(15)  | 10.9(17) |
| C38  | 17.9(18) | 25(2) | 16.8(18) | 0.3(16)  | 3.1(15)  | 5.2(16)  |
| C37  | 17.1(18) | 27(2) | 27(2)    | -4.3(16) | 2.8(16)  | 1.1(18)  |
| C46  | 20.0(19) | 22(2) | 17.5(18) | 2.7(16)  | 4.0(15)  | 9.0(16)  |
| C15  | 37(2)    | 44(3) | 22(2)    | 3(2)     | 14.1(18) | 10.9(19) |
| C32  | 18.9(19) | 38(2) | 21(2)    | -2.5(17) | 3.7(16)  | 2.3(18)  |
| C52  | 24(2)    | 34(2) | 28(2)    | 11.6(17) | -3.3(17) | 4.3(18)  |
| C55  | 27(2)    | 35(2) | 31(2)    | 10.3(18) | 6.2(17)  | 21.0(18) |
| C25  | 24(2)    | 24(2) | 41(2)    | 2.6(17)  | -4.7(18) | 5.5(19)  |
| C35  | 38(2)    | 30(3) | 51(3)    | 2.0(19)  | 15(2)    | 4(2)     |
| C21  | 39(2)    | 26(2) | 42(2)    | 3.0(18)  | 5.4(19)  | 13(2)    |
| C30  | 21.6(19) | 44(3) | 21(2)    | 2.6(18)  | 0.1(16)  | 16.5(19) |
| C43  | 38(2)    | 36(2) | 32(2)    | 10.2(19) | 15.0(18) | 20.9(19) |
| C24  | 40(2)    | 21(2) | 56(3)    | 5.3(19)  | -4(2)    | 1(2)     |
| C36  | 36(2)    | 30(2) | 31(2)    | -1.5(19) | 13.4(18) | 2.5(19)  |
| C5   | 49(3)    | 24(2) | 30(2)    | 2(2)     | -13(2)   | 12.2(18) |
| C42  | 42(2)    | 21(2) | 35(2)    | 11.3(18) | 11.9(19) | 15.1(18) |
| C14  | 34(2)    | 34(3) | 33(2)    | 10.4(19) | 16.4(18) | 5.9(19)  |
| C22  | 45(3)    | 33(3) | 59(3)    | 1(2)     | 11(2)    | 23(2)    |
| C33  | 34(2)    | 49(3) | 29(2)    | -3(2)    | 9.9(19)  | -3(2)    |
| C26  | 48(2)    | 28(3) | 37(2)    | 8(2)     | 11(2)    | -4(2)    |
| C7   | 27(2)    | 26(2) | 54(3)    | 8.6(18)  | -7(2)    | 11(2)    |
| C34  | 39(2)    | 42(3) | 40(3)    | 0(2)     | 18(2)    | -13(2)   |
| C6   | 47(3)    | 25(2) | 43(3)    | 5(2)     | -21(2)   | 14(2)    |
| C23  | 42(2)    | 22(2) | 72(3)    | 0(2)     | 3(2)     | 16(2)    |
| C58S | 51(3)    | 47(3) | 55(3)    | 3(2)     | 4(2)     | 16(2)    |
| C59S | 55(3)    | 59(3) | 77(4)    | -14(3)   | 14(3)    | 16(3)    |
| C63S | 58(3)    | 56(3) | 70(4)    | -13(3)   | 2(3)     | 7(3)     |

|      |         |        |        |        |        |        |
|------|---------|--------|--------|--------|--------|--------|
| C62S | 98(4)   | 60(4)  | 59(4)  | -10(3) | 12(3)  | 13(3)  |
| C57S | 90(4)   | 75(4)  | 81(4)  | 6(3)   | -18(3) | 25(3)  |
| C60S | 48(3)   | 103(5) | 74(4)  | -18(3) | -1(3)  | -10(4) |
| C61S | 81(4)   | 83(4)  | 55(3)  | 4(3)   | -8(3)  | -1(3)  |
| C66S | 70(4)   | 55(4)  | 207(8) | -11(4) | -54(6) | 73(5)  |
| C64S | 260(20) | 60(9)  | 90(10) | 36(11) | 67(12) | 22(8)  |
| C67S | 134(8)  | 52(4)  | 157(8) | -3(5)  | -68(6) | 51(5)  |
| C65S | 96(6)   | 54(4)  | 175(8) | 5(4)   | -33(6) | 57(5)  |

**Table 4** Bond Lengths for ThL2\_FINAL.

| Atom | Atom | Length/Å | Atom | Atom | Length/Å |
|------|------|----------|------|------|----------|
| Th1  | O1   | 2.254(2) | C29  | C38  | 1.403(5) |
| Th1  | O3   | 2.282(2) | C29  | C30  | 1.427(4) |
| Th1  | O4   | 2.289(2) | C56  | C47  | 1.395(4) |
| Th1  | N3   | 2.627(3) | C56  | C55  | 1.427(5) |
| Th1  | N4   | 2.630(3) | C13  | C14  | 1.382(5) |
| Th1  | N2   | 2.608(3) | C31  | C32  | 1.419(5) |
| Th1  | N1   | 2.644(2) | C31  | C30  | 1.354(5) |
| Th1  | O2   | 2.326(2) | C53  | C54  | 1.420(5) |
| O1   | C1   | 1.311(4) | C53  | C52  | 1.417(4) |
| O3   | C29  | 1.312(4) | C41  | C42  | 1.382(4) |
| O4   | C56  | 1.318(4) | C47  | C46  | 1.442(4) |
| N3   | C40  | 1.417(4) | C39  | C38  | 1.440(4) |
| N3   | C39  | 1.307(4) | C50  | C49  | 1.374(4) |
| N4   | C45  | 1.434(4) | C50  | C51  | 1.400(5) |
| N4   | C46  | 1.295(4) | C8   | C7   | 1.374(5) |
| N2   | C17  | 1.433(4) | C54  | C55  | 1.349(4) |
| N2   | C18  | 1.293(4) | C51  | C52  | 1.363(5) |
| N1   | C12  | 1.426(4) | C44  | C43  | 1.382(5) |
| N1   | C11  | 1.297(4) | C38  | C37  | 1.449(5) |
| O2   | C28  | 1.313(4) | C37  | C32  | 1.424(5) |
| C40  | C45  | 1.408(4) | C37  | C36  | 1.401(5) |
| C40  | C41  | 1.395(4) | C15  | C14  | 1.374(5) |
| C19  | C20  | 1.451(5) | C32  | C33  | 1.407(5) |
| C19  | C28  | 1.403(5) | C25  | C24  | 1.410(5) |
| C19  | C18  | 1.427(5) | C25  | C26  | 1.415(5) |
| C10  | C11  | 1.451(4) | C35  | C36  | 1.380(5) |

|     |     |          |      |                   |           |
|-----|-----|----------|------|-------------------|-----------|
| C10 | C9  | 1.447(4) | C35  | C34               | 1.396(5)  |
| C10 | C1  | 1.405(4) | C21  | C22               | 1.372(5)  |
| C45 | C44 | 1.381(4) | C43  | C42               | 1.386(5)  |
| C48 | C53 | 1.414(4) | C24  | C23               | 1.364(5)  |
| C48 | C47 | 1.459(4) | C5   | C6                | 1.347(5)  |
| C48 | C49 | 1.421(4) | C22  | C23               | 1.375(5)  |
| C12 | C17 | 1.394(4) | C33  | C34               | 1.359(6)  |
| C12 | C13 | 1.396(4) | C7   | C6                | 1.389(5)  |
| C2  | C1  | 1.422(4) | C58S | C59S              | 1.382(6)  |
| C2  | C3  | 1.351(5) | C58S | C63S              | 1.370(6)  |
| C9  | C4  | 1.421(4) | C58S | C57S              | 1.498(6)  |
| C9  | C8  | 1.418(5) | C59S | C60S              | 1.347(7)  |
| C16 | C17 | 1.393(4) | C63S | C62S              | 1.376(6)  |
| C16 | C15 | 1.381(5) | C62S | C61S              | 1.356(7)  |
| C4  | C3  | 1.414(5) | C60S | C61S              | 1.385(7)  |
| C4  | C5  | 1.416(5) | C66S | C67S              | 1.425(8)  |
| C20 | C25 | 1.416(5) | C66S | C65S              | 1.369(8)  |
| C20 | C21 | 1.401(5) | C64S | C65S              | 1.422(10) |
| C27 | C28 | 1.427(5) | C67S | C65S <sup>1</sup> | 1.336(9)  |
| C27 | C26 | 1.356(5) |      |                   |           |

<sup>1</sup>-1-X,2-Y,-Z

**Table 5** Bond Angles for ThL2\_FINAL.

| Atom | Atom | Atom | Angle/°   | Atom | Atom | Atom | Angle/°  |
|------|------|------|-----------|------|------|------|----------|
| O3   | Th1  | O1   | 135.40(8) | C30  | C29  | C38  | 119.2(3) |
| O4   | Th1  | O1   | 132.65(8) | C12  | C17  | N2   | 116.6(3) |
| O4   | Th1  | O3   | 84.21(8)  | C16  | C17  | N2   | 122.7(3) |
| N3   | Th1  | O1   | 75.34(8)  | C16  | C17  | C12  | 120.7(3) |
| N3   | Th1  | O3   | 67.17(8)  | C47  | C56  | O4   | 121.9(3) |
| N3   | Th1  | O4   | 110.38(8) | C55  | C56  | O4   | 117.9(3) |
| N4   | Th1  | O1   | 76.15(7)  | C55  | C56  | C47  | 120.1(3) |
| N4   | Th1  | O3   | 104.69(8) | C14  | C13  | C12  | 119.9(3) |
| N4   | Th1  | O4   | 67.66(8)  | C30  | C31  | C32  | 121.9(3) |
| N4   | Th1  | N3   | 61.61(8)  | C10  | C1   | O1   | 122.3(3) |
| N2   | Th1  | O1   | 110.22(7) | C2   | C1   | O1   | 118.1(3) |
| N2   | Th1  | O3   | 75.51(8)  | C2   | C1   | C10  | 119.5(3) |
| N2   | Th1  | O4   | 103.54(8) | C54  | C53  | C48  | 118.7(3) |

|     |     |     |            |     |     |     |          |
|-----|-----|-----|------------|-----|-----|-----|----------|
| N2  | Th1 | N3  | 125.47(8)  | C52 | C53 | C48 | 120.0(3) |
| N2  | Th1 | N4  | 170.99(8)  | C52 | C53 | C54 | 121.3(3) |
| N1  | Th1 | O1  | 68.12(8)   | C42 | C41 | C40 | 121.1(3) |
| N1  | Th1 | O3  | 78.30(8)   | C56 | C47 | C48 | 119.0(3) |
| N1  | Th1 | O4  | 159.18(8)  | C46 | C47 | C48 | 119.1(3) |
| N1  | Th1 | N3  | 73.06(8)   | C46 | C47 | C56 | 121.7(3) |
| N1  | Th1 | N4  | 127.74(8)  | C4  | C3  | C2  | 121.7(3) |
| N1  | Th1 | N2  | 61.26(8)   | C38 | C39 | N3  | 126.8(3) |
| O2  | Th1 | O1  | 83.66(8)   | C51 | C50 | C49 | 121.5(3) |
| O2  | Th1 | O3  | 134.37(8)  | C7  | C8  | C9  | 121.4(3) |
| O2  | Th1 | O4  | 79.63(8)   | C50 | C49 | C48 | 120.9(3) |
| O2  | Th1 | N3  | 158.17(8)  | C55 | C54 | C53 | 122.2(3) |
| O2  | Th1 | N4  | 107.86(8)  | C52 | C51 | C50 | 118.8(3) |
| O2  | Th1 | N2  | 67.47(8)   | C19 | C28 | O2  | 122.7(3) |
| O2  | Th1 | N1  | 104.75(8)  | C27 | C28 | O2  | 119.0(3) |
| C1  | O1  | Th1 | 145.0(2)   | C27 | C28 | C19 | 118.2(3) |
| C29 | O3  | Th1 | 140.23(19) | C43 | C44 | C45 | 121.3(3) |
| C56 | O4  | Th1 | 144.0(2)   | C19 | C18 | N2  | 128.7(3) |
| C40 | N3  | Th1 | 113.26(19) | C39 | C38 | C29 | 120.4(3) |
| C39 | N3  | Th1 | 128.5(2)   | C37 | C38 | C29 | 119.9(3) |
| C39 | N3  | C40 | 118.1(3)   | C37 | C38 | C39 | 119.3(3) |
| C45 | N4  | Th1 | 112.75(19) | C32 | C37 | C38 | 119.0(3) |
| C46 | N4  | Th1 | 130.0(2)   | C36 | C37 | C38 | 123.9(3) |
| C46 | N4  | C45 | 117.2(3)   | C36 | C37 | C32 | 117.1(3) |
| C17 | N2  | Th1 | 112.25(19) | C47 | C46 | N4  | 127.4(3) |
| C18 | N2  | Th1 | 130.3(2)   | C14 | C15 | C16 | 120.6(3) |
| C18 | N2  | C17 | 117.4(3)   | C37 | C32 | C31 | 118.8(3) |
| C12 | N1  | Th1 | 112.66(18) | C33 | C32 | C31 | 121.2(3) |
| C11 | N1  | Th1 | 129.4(2)   | C33 | C32 | C37 | 120.0(4) |
| C11 | N1  | C12 | 117.9(3)   | C51 | C52 | C53 | 121.3(3) |
| C28 | O2  | Th1 | 143.8(2)   | C54 | C55 | C56 | 120.5(3) |
| C45 | C40 | N3  | 116.8(3)   | C24 | C25 | C20 | 119.1(4) |
| C41 | C40 | N3  | 124.2(3)   | C26 | C25 | C20 | 118.3(3) |
| C41 | C40 | C45 | 119.0(3)   | C26 | C25 | C24 | 122.5(4) |
| C28 | C19 | C20 | 120.6(3)   | C34 | C35 | C36 | 119.9(4) |
| C18 | C19 | C20 | 118.5(3)   | C22 | C21 | C20 | 121.2(4) |
| C18 | C19 | C28 | 120.4(3)   | C31 | C30 | C29 | 121.1(4) |
| C9  | C10 | C11 | 118.7(3)   | C42 | C43 | C44 | 119.9(3) |

|     |     |     |          |                   |      |      |           |
|-----|-----|-----|----------|-------------------|------|------|-----------|
| C1  | C10 | C11 | 121.2(3) | C23               | C24  | C25  | 121.4(4)  |
| C1  | C10 | C9  | 119.5(3) | C35               | C36  | C37  | 121.9(4)  |
| C40 | C45 | N4  | 116.7(3) | C6                | C5   | C4   | 121.1(4)  |
| C44 | C45 | N4  | 124.1(3) | C43               | C42  | C41  | 119.6(3)  |
| C44 | C45 | C40 | 119.1(3) | C15               | C14  | C13  | 120.6(3)  |
| C47 | C48 | C53 | 119.4(3) | C23               | C22  | C21  | 121.2(4)  |
| C49 | C48 | C53 | 117.3(3) | C34               | C33  | C32  | 120.9(4)  |
| C49 | C48 | C47 | 123.2(3) | C25               | C26  | C27  | 122.5(4)  |
| C17 | C12 | N1  | 116.6(3) | C6                | C7   | C8   | 120.6(4)  |
| C13 | C12 | N1  | 124.4(3) | C33               | C34  | C35  | 120.2(4)  |
| C13 | C12 | C17 | 118.9(3) | C7                | C6   | C5   | 120.2(3)  |
| C10 | C11 | N1  | 127.6(3) | C22               | C23  | C24  | 119.3(4)  |
| C3  | C2  | C1  | 121.0(3) | C63S              | C58S | C59S | 116.7(4)  |
| C4  | C9  | C10 | 118.9(3) | C57S              | C58S | C59S | 121.5(5)  |
| C8  | C9  | C10 | 124.2(3) | C57S              | C58S | C63S | 121.8(4)  |
| C8  | C9  | C4  | 116.8(3) | C60S              | C59S | C58S | 122.7(5)  |
| C15 | C16 | C17 | 119.2(3) | C62S              | C63S | C58S | 121.6(4)  |
| C3  | C4  | C9  | 119.2(3) | C61S              | C62S | C63S | 120.1(5)  |
| C5  | C4  | C9  | 119.9(3) | C61S              | C60S | C59S | 119.4(5)  |
| C5  | C4  | C3  | 120.9(3) | C60S              | C61S | C62S | 119.4(5)  |
| C25 | C20 | C19 | 118.9(3) | C65S              | C66S | C67S | 122.3(7)  |
| C21 | C20 | C19 | 123.4(3) | C65S <sup>1</sup> | C67S | C66S | 119.3(7)  |
| C21 | C20 | C25 | 117.7(3) | C64S              | C65S | C66S | 122.9(11) |
| C26 | C27 | C28 | 121.1(4) | C67S <sup>1</sup> | C65S | C66S | 118.4(8)  |
| C38 | C29 | O3  | 122.9(3) | C67S <sup>1</sup> | C65S | C64S | 118.7(12) |
| C30 | C29 | O3  | 117.9(3) |                   |      |      |           |

<sup>1</sup>-1-X,2-Y,-Z

**Table 6** Hydrogen Atom Coordinates ( $\text{\AA}\times 10^4$ ) and Isotropic Displacement Parameters ( $\text{\AA}^2\times 10^3$ ) for ThL2\_FINAL.

| Atom | x        | y       | z       | U(eq)    |
|------|----------|---------|---------|----------|
| H11  | -3340(3) | 6285(2) | 2538(2) | 23.9(10) |
| H2   | -396(3)  | 5838(2) | 2(2)    | 29.6(10) |
| H16  | -2350(3) | 3997(3) | 4690(2) | 29.4(10) |
| H27  | 64(3)    | 1855(3) | 601(2)  | 41.8(12) |
| H13  | -3450(3) | 6730(3) | 3934(2) | 32.2(10) |
| H31  | -936(3)  | 7166(3) | 6550(2) | 38.1(12) |
| H41  | 47(3)    | 8500(3) | 2347(2) | 31.4(10) |

|      |          |          |            |          |
|------|----------|----------|------------|----------|
| H3   | -1580(3) | 6706(2)  | -587(2)    | 33.6(11) |
| H39  | 171(3)   | 8264(3)  | 3563(2)    | 26.9(10) |
| H50  | 6578(3)  | 4695(2)  | 364(2)     | 30.8(10) |
| H8   | -4218(3) | 7231(2)  | 2121(2)    | 35.2(11) |
| H49  | 4799(3)  | 5224(2)  | 848(2)     | 28.3(10) |
| H54  | 4796(3)  | 2727(3)  | 2707(2)    | 37.2(11) |
| H51  | 7470(3)  | 3538(3)  | 879(2)     | 35.2(11) |
| H44  | 2692(3)  | 6537(3)  | 692(2)     | 31.5(10) |
| H18  | -2285(3) | 2971(3)  | 3406(2)    | 24.5(10) |
| H46  | 3491(3)  | 5897(2)  | 1570.9(19) | 23.0(9)  |
| H15  | -3607(3) | 5036(3)  | 5537(2)    | 40.7(11) |
| H52  | 6489(3)  | 2843(3)  | 1819(2)    | 34.8(11) |
| H55  | 2998(3)  | 3156(3)  | 3172(2)    | 33.6(11) |
| H35  | -1770(3) | 10401(3) | 5330(3)    | 49.2(13) |
| H21  | -2193(3) | 1674(3)  | 3668(2)    | 41.7(12) |
| H30  | -319(3)  | 5886(3)  | 5514(2)    | 32.7(11) |
| H43  | 2256(3)  | 7966(3)  | 393(2)     | 39.0(11) |
| H24  | -1484(3) | -876(3)  | 1289(3)    | 49.1(13) |
| H36  | -1029(3) | 9167(3)  | 4276(2)    | 40.4(11) |
| H5   | -3326(3) | 7600(3)  | -563(2)    | 40.6(12) |
| H42  | 911(3)   | 8945(3)  | 1214(2)    | 36.7(11) |
| H14  | -4181(3) | 6371(3)  | 5147(2)    | 40.5(11) |
| H22  | -2690(3) | 84(3)    | 3648(3)    | 52.5(13) |
| H33  | -1556(3) | 8830(3)  | 7019(2)    | 48.3(13) |
| H26  | -549(3)  | 305(3)   | 588(2)     | 47.8(12) |
| H7   | -5405(3) | 8039(3)  | 1442(3)    | 42.7(12) |
| H34  | -2001(3) | 10238(3) | 6714(3)    | 54.5(14) |
| H6   | -4979(3) | 8187(3)  | 85(3)      | 45.0(12) |
| H23  | -2386(3) | -1192(3) | 2452(3)    | 53.5(13) |
| H59S | 3503(4)  | 7333(3)  | 5118(3)    | 78.3(17) |
| H63S | 5935(4)  | 9212(4)  | 4615(3)    | 77.4(17) |
| H62S | 5091(5)  | 8947(4)  | 3262(3)    | 88.4(19) |
| H57a | 4760(14) | 8250(20) | 6261(7)    | 122(3)   |
| H57b | 6044(16) | 8230(20) | 5892(4)    | 122(3)   |
| H57c | 5430(30) | 9232(4)  | 6172(9)    | 122(3)   |
| H60S | 2695(4)  | 7023(4)  | 3770(4)    | 100(2)   |
| H61S | 3460(5)  | 7870(4)  | 2835(3)    | 92.7(19) |
| H66S | -6994(6) | 9749(5)  | -50(7)     | 126(3)   |

|      |           |           |          |         |
|------|-----------|-----------|----------|---------|
| H64a | -6840(60) | 10850(70) | 1510(30) | 204(10) |
| H64b | -6540(80) | 9823(10)  | 1640(40) | 204(10) |
| H64c | -5660(20) | 10770(70) | 2019(11) | 204(10) |
| H67S | -5963(9)  | 9348(5)   | -1331(6) | 133(3)  |

**Table 7** Atomic Occupancy for ThL2\_FINAL.

| <i>Atom</i> | <i>Occupancy</i> | <i>Atom</i> | <i>Occupancy</i> | <i>Atom</i> | <i>Occupancy</i> |
|-------------|------------------|-------------|------------------|-------------|------------------|
| C64S        | 0.500000         | H64a        | 0.500000         | H64b        | 0.500000         |
| H64c        | 0.500000         |             |                  |             |                  |

### Refinement model description

Number of restraints - 3, number of constraints - 94.

### Details:

#### 1. Others

Fixed Sof: C64S(0.5) H64a(0.5) H64b(0.5) H64c(0.5)

## Emily091116\_0m – CeL2

**Table 8** Crystal data and structure refinement for **CeL2**

|                                             |                                                                 |
|---------------------------------------------|-----------------------------------------------------------------|
| Identification code                         | Emily091116_0m                                                  |
| Empirical formula                           | C <sub>59</sub> H <sub>36</sub> CeN <sub>4</sub> O <sub>5</sub> |
| Formula weight                              | 1021.08                                                         |
| Temperature/K                               | 180.45                                                          |
| Crystal system                              | monoclinic                                                      |
| Space group                                 | P2 <sub>1</sub> /n                                              |
| a/Å                                         | 13.0103(8)                                                      |
| b/Å                                         | 13.9521(8)                                                      |
| c/Å                                         | 26.1970(15)                                                     |
| α/°                                         | 90                                                              |
| β/°                                         | 99.6888(12)                                                     |
| γ/°                                         | 90                                                              |
| Volume/Å <sup>3</sup>                       | 4687.5(5)                                                       |
| Z                                           | 4                                                               |
| ρ <sub>calc</sub> /mg/mm <sup>3</sup>       | 1.4468                                                          |
| m/mm <sup>-1</sup>                          | 1.028                                                           |
| F(000)                                      | 2064.4                                                          |
| Crystal size/mm <sup>3</sup>                | 0.45 × 0.15 × 0.02                                              |
| Radiation                                   | Mo Kα (λ = 0.71073)                                             |
| 2θ range for data collection                | 3.16 to 53.46°                                                  |
| Index ranges                                | -16 ≤ h ≤ 15, -17 ≤ k ≤ 17, -33 ≤ l ≤ 32                        |
| Reflections collected                       | 61172                                                           |
| Independent reflections                     | 9966 [R <sub>int</sub> = 0.0428, R <sub>sigma</sub> = 0.0340]   |
| Data/restraints/parameters                  | 9966/0/621                                                      |
| Goodness-of-fit on F <sup>2</sup>           | 1.068                                                           |
| Final R indexes [I ≥ 2σ (I)]                | R <sub>1</sub> = 0.0292, wR <sub>2</sub> = 0.0699               |
| Final R indexes [all data]                  | R <sub>1</sub> = 0.0442, wR <sub>2</sub> = 0.0769               |
| Largest diff. peak/hole / e Å <sup>-3</sup> | 0.78/-0.60                                                      |



**Table 9** Fractional Atomic Coordinates ( $\times 10^4$ ) and Equivalent Isotropic Displacement Parameters ( $\text{\AA}^2 \times 10^3$ ) for **CeL2**.  $U_{\text{eq}}$  is defined as 1/3 of the trace of the orthogonalised  $U_{ij}$  tensor.

| Atom | x           | y           | z          | U(eq)    |
|------|-------------|-------------|------------|----------|
| Ce1  | 1318.5(1)   | 924.77(10)  | 1757.27(5) | 16.96(5) |
| O1   | 2153.0(13)  | 1636.4(12)  | 2452.6(6)  | 20.5(4)  |
| O2   | 218.8(13)   | 2157.9(13)  | 1776.9(7)  | 22.6(4)  |
| N4   | 472.8(16)   | 112.9(14)   | 2439.2(8)  | 19.3(4)  |
| C39  | 2988.5(19)  | -1063.5(17) | 2130.4(10) | 19.4(5)  |
| O4   | -210.9(14)  | 285.7(13)   | 1391.0(7)  | 25.3(4)  |
| N1   | 2969.9(16)  | 1761.5(15)  | 1562.4(8)  | 19.7(5)  |
| N2   | 1130.1(16)  | 1872.6(15)  | 927.5(8)   | 19.3(4)  |
| O3   | 1949.3(14)  | -80.5(12)   | 1234.8(7)  | 22.9(4)  |
| N3   | 2356.2(16)  | -437.6(15)  | 2274.5(8)  | 18.7(4)  |
| C46  | -520.0(19)  | 3.7(18)     | 2434.2(10) | 21.0(5)  |
| C9   | 4885(2)     | 2432.3(17)  | 2724.8(10) | 21.6(5)  |
| C11  | 3738.4(19)  | 2143.0(18)  | 1878.7(10) | 21.4(5)  |
| C19  | -626(2)     | 2491.1(18)  | 912.6(10)  | 21.4(5)  |
| C53  | -3244(2)    | 260.7(19)   | 1688.0(12) | 29.4(6)  |
| C29  | 2767(2)     | -616.6(18)  | 1203.3(10) | 20.6(5)  |
| C8   | 5785(2)     | 2590.0(18)  | 2500.9(11) | 26.0(6)  |
| C20  | -1563(2)    | 2823.2(19)  | 578.0(11)  | 25.6(6)  |
| C37  | 4149.1(19)  | -1752.9(17) | 1555.7(10) | 20.0(5)  |
| C12  | 2995(2)     | 1815.7(19)  | 1021.7(10) | 22.2(6)  |
| C40  | 2174(2)     | -483.5(18)  | 2794.6(10) | 20.3(5)  |
| C10  | 3890.0(19)  | 2133.1(17)  | 2432.7(9)  | 19.0(5)  |
| C45  | 1183.8(19)  | -187.4(18)  | 2881.2(10) | 20.6(5)  |
| C56  | -1155(2)    | 301.1(18)   | 1506.0(11) | 24.7(6)  |
| C47  | -1348.4(19) | 231.7(18)   | 2015.1(10) | 21.7(5)  |
| C17  | 2031(2)     | 1838.1(18)  | 685.4(10)  | 21.8(6)  |
| C35  | 5527(2)     | -2890(2)    | 1874.3(11) | 27.7(6)  |
| C42  | 2694(2)     | -761(2)     | 3709.7(11) | 30.6(7)  |
| C18  | 300.1(19)   | 2305.4(18)  | 696.2(10)  | 21.7(5)  |
| C38  | 3300.9(19)  | -1118.8(17) | 1628.3(10) | 18.7(5)  |
| C16  | 1999(2)     | 1792(2)     | 151.9(10)  | 28.5(6)  |
| C32  | 4439(2)     | -1827.3(19) | 1058.2(10) | 25.4(6)  |
| C52  | -4287(2)    | 219(2)      | 1780.9(14) | 36.5(7)  |

|      |            |             |            |         |
|------|------------|-------------|------------|---------|
| C43  | 1721(2)    | -462(2)     | 3797.7(11) | 31.4(7) |
| C34  | 5788(2)    | -2974(2)    | 1379.2(11) | 29.3(6) |
| C4   | 4988(2)    | 2541.8(19)  | 3272.3(11) | 24.6(6) |
| C1   | 3072.5(19) | 1889.4(17)  | 2700(1)    | 19.3(5) |
| C31  | 3890(2)    | -1274(2)    | 646.2(11)  | 32.8(7) |
| C44  | 976(2)     | -169.2(19)  | 3387.6(10) | 26.5(6) |
| C36  | 4729(2)    | -2299.6(19) | 1959.7(11) | 24.4(6) |
| C48  | -2409(2)   | 231.1(18)   | 2112.9(11) | 25.0(6) |
| C21  | -1670(2)   | 2843(2)     | 33.5(11)   | 34.2(7) |
| C25  | -2421(2)   | 3140(2)     | 806.4(12)  | 32.1(7) |
| C6   | 6792(2)    | 3009(2)     | 3329.1(12) | 32.7(7) |
| C5   | 5945(2)    | 2847(2)     | 3559.7(11) | 31.1(6) |
| C30  | 3090(2)    | -690(2)     | 712.2(11)  | 30.3(7) |
| C28  | -597(2)    | 2460.2(18)  | 1452(1)    | 21.9(6) |
| C33  | 5257(2)    | -2450(2)    | 984.5(12)  | 31.2(7) |
| C14  | 3874(2)    | 1757(2)     | 282.8(12)  | 39.6(8) |
| C27  | -1472(2)   | 2805(2)     | 1661.4(11) | 32.1(7) |
| C41  | 2920(2)    | -764.7(19)  | 3211.9(11) | 26.4(6) |
| C54  | -3012(2)   | 320(2)      | 1178.8(12) | 35.0(7) |
| C3   | 4123(2)    | 2301(2)     | 3516.9(11) | 28.8(6) |
| C51  | -4502(2)   | 171(2)      | 2272.5(14) | 39.6(8) |
| C15  | 2917(2)    | 1754(2)     | -46.9(11)  | 36.6(7) |
| C7   | 6715(2)    | 2858(2)     | 2797.4(12) | 30.1(6) |
| C50  | -3690(2)   | 174(2)      | 2691.6(13) | 35.6(7) |
| C23  | -3382(3)   | 3541(3)     | -40.3(14)  | 48.5(9) |
| C26  | -2341(2)   | 3119(2)     | 1349.2(12) | 37.1(7) |
| C55  | -2020(2)   | 344(2)      | 1086.9(12) | 32.4(7) |
| C13  | 3911(2)    | 1774(2)     | 814.6(11)  | 30.9(7) |
| C49  | -2668(2)   | 203(2)      | 2615.4(12) | 30.0(6) |
| C22  | -2555(3)   | 3205(3)     | -264.5(13) | 45.6(8) |
| C24  | -3325(2)   | 3495(2)     | 483.3(14)  | 42.5(8) |
| C2   | 3217(2)    | 1968.1(19)  | 3246.4(10) | 24.6(6) |
| O5s  | -207(2)    | 742(2)      | -412.4(11) | 76.0(9) |
| C59s | 5082(7)    | 60(5)       | 4725(3)    | 164(6)  |
| C58s | 6109(7)    | 503(6)      | 4711(4)    | 164(4)  |
| C57s | 6480(10)   | 598(6)      | 4228(3)    | 209(6)  |

**Table 10** Anisotropic Displacement Parameters ( $\text{\AA}^2 \times 10^3$ ) for **CeL2**. The Anisotropic displacement factor exponent takes the form:  $-2\pi^2[h^2a^{*2}U_{11}+2hka^*b^*U_{12}+\dots]$

| Atom | U <sub>11</sub> | U <sub>22</sub> | U <sub>33</sub> | U <sub>12</sub> | U <sub>13</sub> | U <sub>23</sub> |
|------|-----------------|-----------------|-----------------|-----------------|-----------------|-----------------|
| Ce1  | 17.85(8)        | 19.76(8)        | 13.02(8)        | -0.55(6)        | 1.86(5)         | 1.49(6)         |
| O1   | 19.6(9)         | 24.5(9)         | 17.9(9)         | -3.0(7)         | 4.6(7)          | -1.2(7)         |
| O2   | 23.4(9)         | 27.8(9)         | 15.6(9)         | 4.6(8)          | 0.9(7)          | -0.2(8)         |
| N4   | 21.8(11)        | 20.3(11)        | 15.3(11)        | -0.6(9)         | 1.9(9)          | 2.0(9)          |
| C39  | 19.0(12)        | 20.3(13)        | 18.1(13)        | -1.4(10)        | 1.2(10)         | 3.4(10)         |
| O4   | 24.6(10)        | 30.5(10)        | 19.8(10)        | -5.6(8)         | 1.0(8)          | 1.3(8)          |
| N1   | 20.0(11)        | 25.3(11)        | 13.8(11)        | 1.8(9)          | 3.1(9)          | 2.1(9)          |
| N2   | 20.6(11)        | 22.5(11)        | 14.7(11)        | -2.4(9)         | 3.0(9)          | 1.5(9)          |
| O3   | 26.0(9)         | 25.3(9)         | 17.0(9)         | 4.6(8)          | 2.2(8)          | 0.1(8)          |
| N3   | 20.1(10)        | 22.8(11)        | 13.3(11)        | -1.1(9)         | 2.6(9)          | 1.0(9)          |
| C46  | 23.8(13)        | 20.5(13)        | 19.3(14)        | -1.9(10)        | 5.9(11)         | 0.1(10)         |
| C9   | 22.1(13)        | 16.9(12)        | 24.5(14)        | 2.8(10)         | 0.1(11)         | -0.7(10)        |
| C11  | 20.6(13)        | 22.6(13)        | 21.4(14)        | 0.6(11)         | 5.1(11)         | 2.7(11)         |
| C19  | 22.1(13)        | 20.7(13)        | 20.0(14)        | -0.1(10)        | -0.4(11)        | 1.7(10)         |
| C53  | 23.7(14)        | 20.2(13)        | 41.8(18)        | -2.1(11)        | -2.0(13)        | 0.1(12)         |
| C29  | 22.5(13)        | 20.1(12)        | 19.3(14)        | -3.2(10)        | 3.9(11)         | -0.4(10)        |
| C8   | 25.6(14)        | 24.3(14)        | 27.8(16)        | -2.3(11)        | 3.7(12)         | -2.0(12)        |
| C20  | 23.7(13)        | 24.0(13)        | 26.7(15)        | -4.7(11)        | -2.7(11)        | 3.0(12)         |
| C37  | 19.2(12)        | 20.4(12)        | 20.6(14)        | -4.8(10)        | 3.5(11)         | 1.7(11)         |
| C12  | 24.0(13)        | 28.3(14)        | 15.0(13)        | -2.0(11)        | 5.3(11)         | 3.9(11)         |
| C40  | 23.7(13)        | 20.9(13)        | 15.7(13)        | -0.7(10)        | 2.1(11)         | 1.4(10)         |
| C10  | 20.7(12)        | 19.2(12)        | 16.4(13)        | 1.7(10)         | 1.2(10)         | -1.6(10)        |
| C45  | 22.5(13)        | 20.3(12)        | 18.6(14)        | -1.2(10)        | 2.1(11)         | 2.7(10)         |
| C56  | 22.4(13)        | 21.5(13)        | 28.2(15)        | -5.5(11)        | -1.2(11)        | 1.3(11)         |
| C47  | 20.9(13)        | 18.1(12)        | 24.9(15)        | -4.1(10)        | 0.3(11)         | -0.2(11)        |
| C17  | 26.2(14)        | 23.6(13)        | 16.5(13)        | -1.3(11)        | 6.0(11)         | 3.8(11)         |
| C35  | 22.2(13)        | 28.7(14)        | 31.4(16)        | 1.3(11)         | 2.4(12)         | 4.9(12)         |
| C42  | 37.6(16)        | 35.7(16)        | 15.5(14)        | 6.4(13)         | -4.3(12)        | 1.6(12)         |
| C18  | 25.7(13)        | 22.9(13)        | 15.6(13)        | -3.1(11)        | 1.4(11)         | 3.4(11)         |
| C38  | 19.6(12)        | 17.6(12)        | 19.0(13)        | -2.9(10)        | 3.6(10)         | 0.2(10)         |
| C16  | 30.1(15)        | 37.6(16)        | 17.1(14)        | -0.5(12)        | 2.2(12)         | 3.0(12)         |
| C32  | 26.5(14)        | 28.3(14)        | 23.0(15)        | -0.5(11)        | 8.9(12)         | 2.0(12)         |
| C52  | 22.4(14)        | 24.4(14)        | 59(2)           | -2.3(12)        | -2.2(14)        | -1.0(14)        |
| C43  | 42.1(17)        | 37.2(16)        | 15.5(14)        | 5.4(14)         | 6.4(13)         | 3.2(12)         |
| C34  | 23.1(14)        | 30.3(15)        | 36.5(17)        | 4.1(12)         | 11.3(13)        | 1.7(13)         |

|      |          |          |          |           |           |          |
|------|----------|----------|----------|-----------|-----------|----------|
| C4   | 24.0(13) | 24.7(14) | 22.9(15) | 3.5(11)   | -2.1(11)  | -1.5(11) |
| C1   | 21.0(13) | 17.3(12) | 18.6(13) | 2.2(10)   | 0.4(10)   | -0.6(10) |
| C31  | 38.7(17) | 41.9(16) | 20.4(15) | 6.8(14)   | 13.1(13)  | 4.6(13)  |
| C44  | 29.5(15) | 31.3(15) | 19.9(14) | 3.3(12)   | 7.7(12)   | 1.7(12)  |
| C36  | 22.1(13) | 28.6(14) | 23.1(15) | 0.1(11)   | 5.5(11)   | 1.3(12)  |
| C48  | 20.9(13) | 17.3(12) | 35.7(16) | -4.7(10)  | 1.5(12)   | 0.4(11)  |
| C21  | 32.5(16) | 39.5(17) | 28.1(16) | -3.8(13)  | -2.2(13)  | 4.9(14)  |
| C25  | 27.1(15) | 32.1(15) | 35.2(18) | 2.8(12)   | -0.4(13)  | 3.1(13)  |
| C6   | 23.9(14) | 27.2(15) | 41.6(19) | -0.7(12)  | -10.3(13) | -2.9(13) |
| C5   | 30.0(15) | 32.4(15) | 26.6(16) | 0.4(12)   | -7.2(12)  | -3.0(13) |
| C30  | 39.3(17) | 33.9(15) | 18.5(15) | 6.5(13)   | 7.0(13)   | 7.5(12)  |
| C28  | 23.5(13) | 20.7(13) | 20.8(14) | 1(1)      | 1.6(11)   | 1.0(11)  |
| C33  | 29.8(15) | 38.1(16) | 29.2(16) | 2.5(13)   | 15.0(13)  | 1.0(13)  |
| C14  | 31.2(16) | 65(2)    | 25.7(16) | 4.6(15)   | 14.2(13)  | 11.5(15) |
| C27  | 31.9(15) | 39.7(16) | 25.5(16) | 8.9(13)   | 6.9(13)   | 0.4(13)  |
| C41  | 26.6(14) | 30.1(15) | 21.2(15) | 4.7(11)   | 0.9(12)   | 1.2(11)  |
| C54  | 26.0(15) | 32.6(16) | 40.7(19) | -4.9(12)  | -11.4(13) | 3.5(14)  |
| C3   | 32.8(15) | 36.7(16) | 15.9(14) | 4.1(13)   | 1.3(12)   | -0.0(12) |
| C51  | 22.6(15) | 29.0(16) | 69(2)    | -3.8(12)  | 12.5(16)  | -6.5(16) |
| C15  | 39.1(17) | 58(2)    | 15.1(15) | 3.0(15)   | 10.2(13)  | 4.8(14)  |
| C7   | 22.2(14) | 27.8(14) | 39.5(18) | -1.2(12)  | 3.3(13)   | -1.9(13) |
| C50  | 30.0(16) | 28.8(15) | 51(2)    | -1.9(13)  | 16.0(15)  | -3.3(14) |
| C23  | 33.6(18) | 58(2)    | 46(2)    | 7.3(16)   | -16.1(16) | 11.5(18) |
| C26  | 28.0(15) | 43.4(18) | 40.6(19) | 12.2(13)  | 8.4(14)   | -0.1(15) |
| C55  | 33.2(16) | 34.5(16) | 26.3(16) | -7.5(13)  | -4.4(13)  | 4.7(13)  |
| C13  | 26.0(15) | 45.2(17) | 21.9(15) | 1.2(13)   | 4.8(12)   | 5.1(13)  |
| C49  | 25.1(14) | 27.4(15) | 37.5(18) | -3.3(12)  | 5.2(13)   | -2.3(13) |
| C22  | 40.5(19) | 60(2)    | 31.2(19) | 0.7(16)   | -10.1(15) | 10.3(16) |
| C24  | 26.4(16) | 48(2)    | 50(2)    | 9.8(14)   | -2.4(15)  | 5.6(17)  |
| C2   | 24.3(13) | 30.9(15) | 18.8(14) | 1.8(12)   | 4.4(11)   | 1.1(11)  |
| O5s  | 51.6(16) | 114(3)   | 55.2(18) | -22.1(16) | -12.2(14) | 2.7(17)  |
| C59s | 118(5)   | 76(4)    | 260(13)  | 55(4)     | -82(8)    | -97(8)   |
| C58s | 134(6)   | 108(6)   | 225(10)  | 50(5)     | -43(7)    | -74(7)   |
| C57s | 421(18)  | 101(5)   | 94(5)    | 148(8)    | 8(8)      | 9(4)     |

**Table 11** Bond Lengths for **CeL2**.

| <b>Atom</b> | <b>Atom</b> | <b>Length/Å</b> | <b>Atom</b> | <b>Atom</b> | <b>Length/Å</b> |
|-------------|-------------|-----------------|-------------|-------------|-----------------|
| Ce1         | O1          | 2.1948(17)      | C12         | C13         | 1.391(4)        |
| Ce1         | O2          | 2.2437(17)      | C40         | C45         | 1.407(3)        |
| Ce1         | N4          | 2.519(2)        | C40         | C41         | 1.391(4)        |
| Ce1         | O4          | 2.2433(17)      | C10         | C1          | 1.410(3)        |
| Ce1         | N1          | 2.571(2)        | C45         | C44         | 1.398(4)        |
| Ce1         | N2          | 2.521(2)        | C56         | C47         | 1.402(4)        |
| Ce1         | O3          | 2.2117(17)      | C56         | C55         | 1.435(4)        |
| Ce1         | N3          | 2.580(2)        | C47         | C48         | 1.446(3)        |
| Ce1         | C56         | 3.291(3)        | C17         | C16         | 1.393(4)        |
| Ce1         | C28         | 3.281(3)        | C35         | C34         | 1.400(4)        |
| O1          | C1          | 1.309(3)        | C35         | C36         | 1.374(4)        |
| O2          | C28         | 1.313(3)        | C42         | C43         | 1.388(4)        |
| N4          | C46         | 1.299(3)        | C42         | C41         | 1.384(4)        |
| N4          | C45         | 1.418(3)        | C16         | C15         | 1.381(4)        |
| C39         | N3          | 1.299(3)        | C32         | C31         | 1.418(4)        |
| C39         | C38         | 1.443(3)        | C32         | C33         | 1.413(4)        |
| O4          | C56         | 1.313(3)        | C52         | C51         | 1.365(5)        |
| N1          | C11         | 1.300(3)        | C43         | C44         | 1.383(4)        |
| N1          | C12         | 1.424(3)        | C34         | C33         | 1.356(4)        |
| N2          | C17         | 1.424(3)        | C4          | C5          | 1.408(4)        |
| N2          | C18         | 1.295(3)        | C4          | C3          | 1.426(4)        |
| O3          | C29         | 1.315(3)        | C1          | C2          | 1.416(4)        |
| N3          | C40         | 1.423(3)        | C31         | C30         | 1.355(4)        |
| C46         | C47         | 1.439(4)        | C48         | C49         | 1.413(4)        |
| C9          | C8          | 1.413(4)        | C21         | C22         | 1.374(4)        |
| C9          | C10         | 1.450(3)        | C25         | C26         | 1.409(4)        |
| C9          | C4          | 1.426(4)        | C25         | C24         | 1.418(4)        |
| C11         | C10         | 1.431(3)        | C6          | C5          | 1.362(4)        |
| C19         | C20         | 1.452(4)        | C6          | C7          | 1.396(4)        |
| C19         | C18         | 1.439(4)        | C28         | C27         | 1.428(4)        |
| C19         | C28         | 1.408(4)        | C14         | C15         | 1.391(4)        |
| C53         | C52         | 1.418(4)        | C14         | C13         | 1.386(4)        |
| C53         | C48         | 1.419(4)        | C27         | C26         | 1.352(4)        |
| C53         | C54         | 1.419(4)        | C54         | C55         | 1.353(4)        |
| C29         | C38         | 1.397(4)        | C3          | C2          | 1.351(4)        |
| C29         | C30         | 1.423(4)        | C51         | C50         | 1.390(4)        |

|     |     |          |      |                   |           |
|-----|-----|----------|------|-------------------|-----------|
| C8  | C7  | 1.374(4) | C50  | C49               | 1.378(4)  |
| C20 | C21 | 1.410(4) | C23  | C22               | 1.391(5)  |
| C20 | C25 | 1.423(4) | C23  | C24               | 1.363(5)  |
| C37 | C38 | 1.452(3) | C59s | C59s <sup>1</sup> | 1.503(19) |
| C37 | C32 | 1.420(4) | C59s | C58s              | 1.479(14) |
| C37 | C36 | 1.415(4) | C58s | C57s              | 1.435(13) |
| C12 | C17 | 1.407(4) |      |                   |           |

<sup>1</sup>1-X,-Y,1-Z

**Table 12** Bond Angles for **CeL2**.

| Atom | Atom | Atom | Angle/°   | Atom | Atom | Atom | Angle/°    |
|------|------|------|-----------|------|------|------|------------|
| O2   | Ce1  | O1   | 82.09(6)  | C36  | C37  | C32  | 117.2(2)   |
| N4   | Ce1  | O1   | 80.15(6)  | C17  | C12  | N1   | 117.2(2)   |
| N4   | Ce1  | O2   | 88.41(6)  | C13  | C12  | N1   | 123.4(2)   |
| O4   | Ce1  | O1   | 144.50(6) | C13  | C12  | C17  | 119.3(2)   |
| O4   | Ce1  | O2   | 77.96(7)  | C45  | C40  | N3   | 116.5(2)   |
| O4   | Ce1  | N4   | 70.29(6)  | C41  | C40  | N3   | 123.9(2)   |
| N1   | Ce1  | O1   | 69.28(6)  | C41  | C40  | C45  | 119.5(2)   |
| N1   | Ce1  | O2   | 102.34(6) | C11  | C10  | C9   | 119.4(2)   |
| N1   | Ce1  | N4   | 145.52(7) | C1   | C10  | C9   | 119.2(2)   |
| N1   | Ce1  | O4   | 143.74(6) | C1   | C10  | C11  | 121.3(2)   |
| N2   | Ce1  | O1   | 116.18(6) | C40  | C45  | N4   | 116.3(2)   |
| N2   | Ce1  | O2   | 69.37(6)  | C44  | C45  | N4   | 124.4(2)   |
| N2   | Ce1  | N4   | 148.94(7) | C44  | C45  | C40  | 119.2(2)   |
| N2   | Ce1  | O4   | 83.64(6)  | O4   | C56  | Ce1  | 29.48(11)  |
| N2   | Ce1  | N1   | 63.50(6)  | C47  | C56  | Ce1  | 98.86(16)  |
| O3   | Ce1  | O1   | 128.11(6) | C47  | C56  | O4   | 122.8(2)   |
| O3   | Ce1  | O2   | 143.59(6) | C55  | C56  | Ce1  | 139.15(19) |
| O3   | Ce1  | N4   | 113.92(7) | C55  | C56  | O4   | 117.9(2)   |
| O3   | Ce1  | O4   | 83.00(7)  | C55  | C56  | C47  | 119.2(2)   |
| O3   | Ce1  | N1   | 75.85(7)  | C56  | C47  | C46  | 120.7(2)   |
| O3   | Ce1  | N2   | 77.96(7)  | C48  | C47  | C46  | 118.7(2)   |
| N3   | Ce1  | O1   | 75.83(6)  | C48  | C47  | C56  | 119.9(2)   |
| N3   | Ce1  | O2   | 146.33(6) | C12  | C17  | N2   | 115.8(2)   |
| N3   | Ce1  | N4   | 63.17(6)  | C16  | C17  | N2   | 124.2(2)   |
| N3   | Ce1  | O4   | 106.25(6) | C16  | C17  | C12  | 120.0(2)   |
| N3   | Ce1  | N1   | 93.32(6)  | C36  | C35  | C34  | 120.6(3)   |

|     |     |     |            |     |     |     |            |
|-----|-----|-----|------------|-----|-----|-----|------------|
| N3  | Ce1 | N2  | 143.68(6)  | C41 | C42 | C43 | 120.1(3)   |
| N3  | Ce1 | O3  | 69.02(6)   | C19 | C18 | N2  | 125.9(2)   |
| C56 | Ce1 | O1  | 128.03(6)  | C29 | C38 | C39 | 121.4(2)   |
| C56 | Ce1 | O2  | 66.52(6)   | C37 | C38 | C39 | 119.3(2)   |
| C56 | Ce1 | N4  | 59.60(7)   | C37 | C38 | C29 | 119.2(2)   |
| C56 | Ce1 | O4  | 16.74(7)   | C15 | C16 | C17 | 119.9(3)   |
| C56 | Ce1 | N1  | 154.42(7)  | C31 | C32 | C37 | 118.8(2)   |
| C56 | Ce1 | N2  | 90.93(7)   | C33 | C32 | C37 | 119.5(2)   |
| C56 | Ce1 | O3  | 99.25(7)   | C33 | C32 | C31 | 121.7(2)   |
| C56 | Ce1 | N3  | 108.54(6)  | C51 | C52 | C53 | 121.2(3)   |
| C28 | Ce1 | O1  | 98.99(6)   | C44 | C43 | C42 | 120.0(3)   |
| C28 | Ce1 | O2  | 17.06(6)   | C33 | C34 | C35 | 119.3(3)   |
| C28 | Ce1 | N4  | 93.55(6)   | C5  | C4  | C9  | 119.7(2)   |
| C28 | Ce1 | O4  | 64.70(6)   | C3  | C4  | C9  | 118.6(2)   |
| C28 | Ce1 | N1  | 106.32(6)  | C3  | C4  | C5  | 121.7(3)   |
| C28 | Ce1 | N2  | 59.18(6)   | C10 | C1  | O1  | 121.5(2)   |
| C28 | Ce1 | O3  | 127.50(6)  | C2  | C1  | O1  | 118.4(2)   |
| C28 | Ce1 | N3  | 156.60(6)  | C2  | C1  | C10 | 120.0(2)   |
| C28 | Ce1 | C56 | 56.43(6)   | C30 | C31 | C32 | 121.9(3)   |
| C1  | O1  | Ce1 | 144.66(16) | C43 | C44 | C45 | 120.6(2)   |
| C28 | O2  | Ce1 | 132.87(15) | C35 | C36 | C37 | 121.6(3)   |
| C46 | N4  | Ce1 | 126.73(17) | C47 | C48 | C53 | 119.3(3)   |
| C45 | N4  | Ce1 | 114.15(15) | C49 | C48 | C53 | 117.4(2)   |
| C45 | N4  | C46 | 119.0(2)   | C49 | C48 | C47 | 123.3(2)   |
| C38 | C39 | N3  | 126.2(2)   | C22 | C21 | C20 | 120.9(3)   |
| C56 | O4  | Ce1 | 133.78(17) | C26 | C25 | C20 | 119.2(3)   |
| C11 | N1  | Ce1 | 129.64(16) | C24 | C25 | C20 | 119.2(3)   |
| C12 | N1  | Ce1 | 112.42(15) | C24 | C25 | C26 | 121.5(3)   |
| C12 | N1  | C11 | 117.9(2)   | C7  | C6  | C5  | 119.3(3)   |
| C17 | N2  | Ce1 | 113.49(15) | C6  | C5  | C4  | 121.5(3)   |
| C18 | N2  | Ce1 | 126.90(16) | C31 | C30 | C29 | 120.6(3)   |
| C18 | N2  | C17 | 119.4(2)   | O2  | C28 | Ce1 | 30.07(11)  |
| C29 | O3  | Ce1 | 142.02(16) | C19 | C28 | Ce1 | 98.96(16)  |
| C39 | N3  | Ce1 | 130.07(17) | C19 | C28 | O2  | 122.9(2)   |
| C40 | N3  | Ce1 | 112.28(15) | C27 | C28 | Ce1 | 138.44(18) |
| C40 | N3  | C39 | 117.6(2)   | C27 | C28 | O2  | 118.0(2)   |
| C47 | C46 | N4  | 126.7(2)   | C27 | C28 | C19 | 119.1(2)   |
| C10 | C9  | C8  | 123.7(2)   | C34 | C33 | C32 | 121.8(3)   |

|     |     |     |          |      |      |      |          |
|-----|-----|-----|----------|------|------|------|----------|
| C4  | C9  | C8  | 117.2(2) | C13  | C14  | C15  | 120.0(3) |
| C4  | C9  | C10 | 119.1(2) | C26  | C27  | C28  | 121.1(3) |
| C10 | C11 | N1  | 127.0(2) | C42  | C41  | C40  | 120.5(3) |
| C18 | C19 | C20 | 119.5(2) | C55  | C54  | C53  | 122.0(3) |
| C28 | C19 | C20 | 119.6(2) | C2   | C3   | C4   | 122.0(2) |
| C28 | C19 | C18 | 120.5(2) | C50  | C51  | C52  | 119.7(3) |
| C48 | C53 | C52 | 119.5(3) | C14  | C15  | C16  | 120.4(3) |
| C54 | C53 | C52 | 121.7(3) | C6   | C7   | C8   | 120.9(3) |
| C54 | C53 | C48 | 118.9(3) | C49  | C50  | C51  | 120.6(3) |
| C38 | C29 | O3  | 122.3(2) | C24  | C23  | C22  | 119.6(3) |
| C30 | C29 | O3  | 117.6(2) | C27  | C26  | C25  | 122.0(3) |
| C30 | C29 | C38 | 120.1(2) | C54  | C55  | C56  | 120.8(3) |
| C7  | C8  | C9  | 121.3(3) | C14  | C13  | C12  | 120.4(3) |
| C21 | C20 | C19 | 123.2(3) | C50  | C49  | C48  | 121.5(3) |
| C25 | C20 | C19 | 118.9(2) | C23  | C22  | C21  | 121.2(3) |
| C25 | C20 | C21 | 117.9(3) | C23  | C24  | C25  | 121.1(3) |
| C32 | C37 | C38 | 119.3(2) | C3   | C2   | C1   | 120.8(2) |
| C36 | C37 | C38 | 123.5(2) | C57s | C58s | C59s | 120.0(9) |

**Table 13** Hydrogen Atom Coordinates ( $\text{\AA}\times 10^4$ ) and Isotropic Displacement Parameters ( $\text{\AA}^2\times 10^3$ ) for **CeL2**.

| Atom | x          | y           | z          | U(eq)   |
|------|------------|-------------|------------|---------|
| H39  | 3272.5(19) | -1529.1(17) | 2379.3(10) | 23.2(6) |
| H46  | -720.0(19) | -253.2(18)  | 2738.7(10) | 25.2(6) |
| H11  | 4255.1(19) | 2462.9(18)  | 1725.6(10) | 25.6(7) |
| H8   | 5748(2)    | 2509.1(18)  | 2138.2(11) | 31.2(7) |
| H35  | 5906(2)    | -3245(2)    | 2153.8(11) | 33.2(7) |
| H42  | 3205(2)    | -964(2)     | 3991.6(11) | 36.7(8) |
| H18  | 303.0(19)  | 2519.8(18)  | 352.3(10)  | 26.0(7) |
| H16  | 1348(2)    | 1787(2)     | -75.1(10)  | 34.2(7) |
| H52  | -4845(2)   | 225(2)      | 1495.9(14) | 43.8(9) |
| H43  | 1568(2)    | -459(2)     | 4139.7(11) | 37.7(8) |
| H34  | 6331(2)    | -3393(2)    | 1320.2(11) | 35.1(8) |
| H31  | 4089(2)    | -1314(2)    | 314.1(11)  | 39.3(8) |
| H44  | 316(2)     | 46.6(19)    | 3450.5(10) | 31.8(7) |
| H36  | 4561(2)    | -2257.2(19) | 2298.2(11) | 29.3(7) |
| H21  | -1123(2)   | 2604(2)     | -129.4(11) | 41.1(8) |



|     |          |            |            |          |
|-----|----------|------------|------------|----------|
| H6  | 7429(2)  | 3222(2)    | 3528.3(12) | 39.2(8)  |
| H5  | 6001(2)  | 2942(2)    | 3922.4(11) | 37.3(8)  |
| H30 | 2742(2)  | -328(2)    | 428.1(11)  | 36.4(8)  |
| H33 | 5441(2)  | -2504(2)   | 649.7(12)  | 37.4(8)  |
| H14 | 4502(2)  | 1746(2)    | 143.5(12)  | 47.5(9)  |
| H27 | -1443(2) | 2814(2)    | 2026.2(11) | 38.6(8)  |
| H41 | 3591(2)  | -960.8(19) | 3154.9(11) | 31.6(7)  |
| H54 | -3570(2) | 344(2)     | 894.0(12)  | 42.1(8)  |
| H3  | 4185(2)  | 2378(2)    | 3881.2(11) | 34.5(7)  |
| H51 | -5204(2) | 135(2)     | 2327.9(14) | 47.5(9)  |
| H15 | 2894(2)  | 1726(2)    | -411.0(11) | 43.9(9)  |
| H7  | 7313(2)  | 2942(2)    | 2638.1(12) | 36.1(8)  |
| H50 | -3841(2) | 155(2)     | 3033.9(13) | 42.8(9)  |
| H23 | -3983(3) | 3800(3)    | -251.0(14) | 58.2(11) |
| H26 | -2914(2) | 3333(2)    | 1500.6(12) | 44.5(9)  |
| H55 | -1894(2) | 390(2)     | 740.9(12)  | 38.9(8)  |
| H13 | 4565(2)  | 1758(2)    | 1038.9(11) | 37.1(8)  |
| H49 | -2125(2) | 204(2)     | 2907.4(12) | 36.0(8)  |
| H22 | -2603(3) | 3226(3)    | -630.3(13) | 54.8(10) |
| H24 | -3901(2) | 3705(2)    | 634.3(14)  | 51(1)    |
| H2  | 2670(2)  | 1784.3(19) | 3425(1)    | 29.5(7)  |

## Refinement model description

Number of restraints - 0, number of constraints - 72.

### Details:

#### 1. Fixed Uiso

At 1.2 times of:

All C(H) groups

#### 2.a Aromatic/amide H refined with riding coordinates:

C39 (H39), C46 (H46), C11 (H11), C8 (H8), C35 (H35), C42 (H42), C18 (H18),  
C16 (H16),  
C52 (H52), C43 (H43), C34 (H34), C31 (H31), C44 (H44), C36 (H36), C21 (H21),  
C6 (H6),  
C5 (H5), C30 (H30), C33 (H33), C14 (H14), C27 (H27), C41 (H41), C54 (H54), C3 (H3),  
C51 (H51), C15 (H15), C7 (H7), C50 (H50), C23 (H23), C26 (H26), C55 (H55),  
C13 (H13),  
C49 (H49), C22 (H22), C24 (H24), C2 (H2)

## Computational Details

The B3LYP functional was chosen combined with the correlation consistent cc-pVDZ basis set for C, N, H, and O atoms. For Ce and Th, the Stuttgart relativistic small-core effective core potentials (RSC-ECP) and their companion basis sets were used.<sup>4,5</sup> The inner 27 and 80 electrons are represented by the RSC-ECP for Ce and Th, respectively. A set of 5s5p4d3f/Ce and 8s7p6d4f/Th Gaussian basis functions were employed for the rest of the electrons.

The experimental geometries were used as initial structures to optimize the geometry at the B3LYP level. The Gaussian16 package was invoked for this reason. No other low-lying structures (isomers) were located. The TD-DFT calculations for the excited states were done with NWChem. The vertical excitation energies and transition dipole moments were obtained with TD-DFT.

## DFT optimized structures

The B3LYP/cc-pVDZ optimized geometries are

### Th-complex

```
Th 0.0300000000 0.0000000000 0.0000000000
O -1.1690000000 0.6880000000 1.8330000000
O -1.1700000000 -0.6860000000 -1.8320000000
O 1.8210000000 -1.1130000000 -0.9600000000
N -1.6550000000 -2.0370000000 0.5030000000
N 0.8520000000 -2.0610000000 1.4450000000
N 0.8530000000 2.0620000000 -1.4450000000
N -1.6540000000 2.0390000000 -0.5030000000
O 1.8220000000 1.1120000000 0.9600000000
C -1.4840000000 -2.4930000000 1.8320000000
C 3.1080000000 2.4620000000 -0.5430000000
C -2.8880000000 2.3340000000 1.6120000000
C -0.1580000000 -2.5010000000 2.3350000000
C 4.3790000000 -3.1180000000 0.8080000000
C -1.4820000000 2.4950000000 -1.8320000000
C -2.5440000000 2.6350000000 0.2490000000
H -3.0700000000 3.4880000000 -0.1970000000
C -2.4840000000 1.1290000000 3.7280000000
H -1.8940000000 0.3790000000 4.2570000000
C -3.9690000000 3.0640000000 2.2610000000
C 0.0780000000 2.8960000000 -3.6600000000
H 1.0930000000 2.8590000000 -4.0580000000
C -4.2620000000 2.7990000000 3.6380000000
C 4.3810000000 3.1170000000 -0.8070000000
C 3.9900000000 1.7150000000 1.6360000000
H 3.8070000000 1.1670000000 2.5610000000
C -2.1540000000 -1.3650000000 -2.3540000000
C -0.1560000000 2.5020000000 -2.3340000000
C 2.9290000000 -1.7320000000 -0.6680000000
C -2.5370000000 2.8810000000 -2.6730000000
H -3.5630000000 2.8260000000 -2.3040000000
C -3.4880000000 -1.8220000000 -4.3410000000
H -3.7220000000 -1.6330000000 -5.3920000000
C -2.1550000000 1.3650000000 2.3530000000
C 5.4120000000 -3.0680000000 -0.1820000000
C -2.5400000000 -2.8780000000 2.6730000000
H -3.5650000000 -2.8230000000 2.3040000000
C 3.1070000000 -2.4630000000 0.5440000000
C -3.4920000000 1.8200000000 4.3390000000
H -3.7280000000 1.6290000000 5.3890000000
C -2.5440000000 -2.6340000000 -0.2490000000
H -3.0710000000 -3.4860000000 0.1970000000
C 5.9000000000 -4.4140000000 2.2250000000
H 6.0900000000 -4.9260000000 3.1720000000
C -4.7790000000 4.0330000000 1.6070000000
H -4.6210000000 4.2670000000 0.5550000000
C 4.6780000000 -3.7960000000 2.0210000000
H 3.9460000000 -3.8230000000 2.8280000000
C 5.1720000000 -2.3590000000 -1.4010000000
H 5.9670000000 -2.3320000000 -2.1510000000
C 6.9030000000 -4.3790000000 1.2340000000
H 7.8640000000 -4.8670000000 1.4060000000
C 2.9300000000 1.7310000000 0.6680000000
C 0.0750000000 -2.8950000000 3.6610000000
```

H 1.0910000000 -2.8580000000 4.0590000000  
 C 2.0050000000 2.6820000000 -1.4360000000  
 H 2.1270000000 3.5130000000 -2.1440000000  
 C -2.8880000000 -2.3330000000 -1.6120000000  
 C -3.9680000000 -3.0640000000 -2.2620000000  
 C 2.0030000000 -2.6820000000 1.4370000000  
 H 2.1250000000 -3.5120000000 2.1460000000  
 C -0.9810000000 3.2940000000 -4.4800000000  
 H -0.7850000000 3.5860000000 -5.5140000000  
 C -4.2590000000 -2.8010000000 -3.6410000000  
 C 6.6550000000 -3.7070000000 0.0530000000  
 H 7.4230000000 -3.6530000000 -0.7240000000  
 C 3.9890000000 -1.7170000000 -1.6350000000  
 H 3.8060000000 -1.1690000000 -2.5600000000  
 C 5.4140000000 3.0670000000 0.1830000000  
 C -5.7890000000 -4.7050000000 -2.2740000000  
 H -6.3860000000 -5.4430000000 -1.7330000000  
 C 4.6800000000 3.7960000000 -2.0190000000  
 H 3.9480000000 3.8230000000 -2.8270000000  
 C -2.4810000000 -1.1300000000 -3.7290000000  
 H -1.8910000000 -0.3800000000 -4.2580000000  
 C -0.9830000000 -3.2910000000 4.4800000000  
 H -0.7880000000 -3.5830000000 5.5150000000  
 C 6.6570000000 3.7050000000 -0.0510000000  
 H 7.4240000000 3.6510000000 0.7260000000  
 C -4.7780000000 -4.0340000000 -1.6090000000  
 H -4.6210000000 -4.2660000000 -0.5560000000  
 C -5.3060000000 3.4990000000 4.2950000000  
 H -5.5000000000 3.2730000000 5.3470000000  
 C -2.2920000000 -3.2830000000 3.9860000000  
 H -3.1250000000 -3.5670000000 4.6310000000  
 C -2.2890000000 3.2870000000 -3.9860000000  
 H -3.1220000000 3.5710000000 -4.6310000000  
 C 5.9020000000 4.4140000000 -2.2230000000  
 H 6.0920000000 4.9260000000 -3.1700000000  
 C -5.3010000000 -3.5020000000 -4.2980000000  
 H -5.4940000000 -3.2770000000 -5.3500000000  
 C 5.1730000000 2.3570000000 1.4020000000  
 H 5.9690000000 2.3290000000 2.1520000000  
 C -5.7920000000 4.7040000000 2.2720000000  
 H -6.3880000000 5.4420000000 1.7310000000  
 C -6.0600000000 -4.4450000000 -3.6340000000  
 H -6.8600000000 -4.9800000000 -4.1490000000  
 C -6.0640000000 4.4420000000 3.6310000000  
 H -6.8650000000 4.9770000000 4.1450000000  
 C 6.9050000000 4.3780000000 -1.2320000000  
 H 7.8670000000 4.8660000000 -1.4030000000

**Ce-complex**

Ce -0.0180000000 0.0000000000 0.0000000000  
 O 1.1290000000 -0.6880000000 1.7990000000  
 O -1.7550000000 -1.0800000000 0.9490000000  
 N -0.8420000000 1.9890000000 1.4700000000  
 N 1.6550000000 -1.9850000000 -0.5360000000  
 N -0.8420000000 -1.9890000000 -1.4690000000  
 C 3.9560000000 -3.0270000000 2.2270000000  
 C 2.5450000000 -2.5880000000 0.2050000000  
 H 3.0820000000 -3.4280000000 -0.2530000000  
 C 4.7840000000 -3.9800000000 1.5710000000  
 H 4.6380000000 -4.2030000000 0.5150000000  
 C 1.4860000000 -2.4100000000 -1.8720000000  
 C 2.8750000000 -2.3040000000 1.5750000000

C 0.1600000000 -2.4080000000 -2.3720000000  
 C -1.9990000000 -2.5920000000 -1.4720000000  
 H -2.1400000000 -3.4060000000 -2.1970000000  
 C -0.0780000000 -2.7730000000 -3.7050000000  
 C 4.2310000000 -2.7740000000 3.6110000000  
 C 2.1180000000 -1.3540000000 2.3180000000  
 H -1.0930000000 2.7270000000 4.1010000000  
 C 6.0520000000 -4.3950000000 3.6040000000  
 H 6.8540000000 -4.9260000000 4.1210000000  
 C 5.2760000000 -3.4680000000 4.2710000000  
 H 5.4570000000 -3.2520000000 5.3270000000  
 C 2.2890000000 -3.1530000000 -4.0440000000  
 H 3.1220000000 -3.4220000000 -4.6980000000  
 C 3.4410000000 -1.8110000000 4.3140000000  
 H 3.6630000000 -1.6290000000 5.3690000000  
 C 5.7970000000 -4.6450000000 2.2390000000  
 H 6.4080000000 -5.3710000000 1.6970000000  
 C 2.5410000000 -2.7760000000 -2.7230000000  
 H 3.5680000000 -2.7280000000 -2.3550000000  
 C 2.4300000000 -1.1270000000 3.7000000000  
 H 1.8260000000 -0.3900000000 4.2300000000  
 H -1.0940000000 -2.7280000000 -4.1000000000  
 C 0.9800000000 -3.1510000000 -4.5360000000  
 H 0.7820000000 -3.4200000000 -5.5750000000  
 C 2.5450000000 2.5870000000 -0.2050000000  
 H 3.0830000000 3.4270000000 0.2530000000  
 O 1.1290000000 0.6870000000 -1.7980000000  
 N 1.6560000000 1.9840000000 0.5360000000  
 C 2.1180000000 1.3530000000 -2.3180000000  
 C 3.9550000000 3.0270000000 -2.2280000000  
 C 1.4870000000 2.4090000000 1.8730000000  
 C 0.1610000000 2.4070000000 2.3720000000  
 C 5.7960000000 4.6460000000 -2.2400000000  
 H 6.4070000000 5.3720000000 -1.6980000000  
 C 2.2900000000 3.1510000000 4.0440000000  
 H 3.1230000000 3.4200000000 4.6980000000  
 C 2.8740000000 2.3040000000 -1.5750000000  
 C 4.2300000000 2.7740000000 -3.6120000000  
 C 0.9810000000 3.1500000000 4.5360000000  
 H 0.7840000000 3.4190000000 5.5760000000  
 C 6.0500000000 4.3970000000 -3.6050000000  
 H 6.8520000000 4.9270000000 -4.1220000000  
 C 3.4390000000 1.8120000000 -4.3140000000  
 H 3.6610000000 1.6300000000 -5.3700000000  
 C -0.0770000000 2.7720000000 3.7060000000  
 C 4.7830000000 3.9800000000 -1.5720000000  
 H 4.6380000000 4.2030000000 -0.5160000000  
 C 2.4300000000 1.1270000000 -3.7000000000  
 H 1.8250000000 0.3900000000 -4.2310000000  
 C 5.2740000000 3.4690000000 -4.2720000000  
 H 5.4550000000 3.2540000000 -5.3280000000  
 C 2.5420000000 2.7750000000 2.7230000000  
 H 3.5680000000 2.7270000000 2.3550000000  
 O -1.7540000000 1.0810000000 -0.9490000000  
 C -1.9990000000 2.5920000000 1.4730000000  
 C -3.0920000000 -2.3670000000 -0.5660000000  
 C -5.4050000000 2.9180000000 -0.1730000000  
 C -4.3810000000 -2.9870000000 -0.8240000000  
 C -2.8820000000 1.6570000000 -0.6520000000  
 C -3.0910000000 2.3670000000 0.5660000000  
 C -6.6650000000 3.5240000000 0.0580000000  
 H -7.4260000000 3.4560000000 -0.7240000000  
 C -4.3800000000 2.9870000000 0.8250000000

C -4.7030000000 -3.6510000000 -2.0390000000  
C -5.4060000000 -2.9180000000 0.1730000000  
C -2.8830000000 -1.6560000000 0.6520000000  
C -3.9380000000 -1.6160000000 1.6260000000  
H -3.7330000000 -1.0820000000 2.5550000000  
C -5.1380000000 2.2240000000 -1.3950000000  
H -5.9280000000 2.1810000000 -2.1500000000  
C -6.9360000000 4.1820000000 1.2430000000  
H -7.9110000000 4.6450000000 1.4110000000  
C -5.9410000000 4.2370000000 2.2400000000  
H -6.1490000000 4.7400000000 3.1880000000  
C -5.1390000000 -2.2230000000 1.3950000000  
H -5.9290000000 -2.1800000000 2.1500000000  
C -3.9370000000 1.6170000000 -1.6260000000  
H -3.7320000000 1.0830000000 -2.5550000000  
C -4.7020000000 3.6520000000 2.0400000000  
H -3.9750000000 3.6940000000 2.8510000000  
C -6.6660000000 -3.5230000000 -0.0580000000  
H -7.4270000000 -3.4550000000 0.7240000000  
H -3.9760000000 -3.6940000000 -2.8510000000  
C -6.9370000000 -4.1820000000 -1.2420000000  
H -7.9120000000 -4.6450000000 -1.4100000000  
C -5.9420000000 -4.2370000000 -2.2400000000  
H -6.1500000000 -4.7400000000 -3.1870000000  
H -2.1390000000 3.4050000000 2.1980000000

## TD-DFT vertical excitation energies and transition dipole moments

The B3LYP/cc-pVDZ excitation energies ( $\Delta E$ , eV) and transition dipole moments ( $\mu$ , a.u.) are:

### Th-complex

| State | $\Delta E$ | $\mu$  | State | $\Delta E$ | $\mu$  |
|-------|------------|--------|-------|------------|--------|
| 1     | 2.8762     | 0.9973 | 11    | 3.2317     | 0.1152 |
| 2     | 2.9569     | 0.2192 | 12    | 3.2872     | 0.3811 |
| 3     | 2.9826     | 0.6182 | 13    | 3.3320     | 0.0109 |
| 4     | 3.0605     | 0.3396 | 14    | 3.3424     | 0.2195 |
| 5     | 3.0739     | 0.8624 | 15    | 3.4006     | 0.5399 |
| 6     | 3.1143     | 0.3448 | 16    | 3.4341     | 2.4020 |
| 7     | 3.1536     | 0.2832 | 17    | 3.7866     | 1.2257 |
| 8     | 3.1814     | 0.9174 | 18    | 3.8019     | 1.3213 |
| 9     | 3.1978     | 0.7228 | 19    | 3.8290     | 0.8023 |
| 10    | 3.2259     | 1.8956 | 20    | 3.8574     | 0.3905 |

### Ce-complex

| State | $\Delta E$ | $\mu$  | State | $\Delta E$ | $\mu$  |
|-------|------------|--------|-------|------------|--------|
| 1     | 1.4457     | 0.0658 | 51    | 2.8171     | 0.3512 |
| 2     | 1.4575     | 0.0742 | 52    | 2.8224     | 0.1011 |
| 3     | 1.4666     | 0.1857 | 53    | 2.8261     | 0.0589 |
| 4     | 1.5095     | 0.1259 | 54    | 2.8521     | 0.0446 |
| 5     | 1.6004     | 0.2492 | 55    | 2.8538     | 0.2077 |

|    |        |        |    |        |        |
|----|--------|--------|----|--------|--------|
| 6  | 1.6424 | 0.3959 | 56 | 2.8655 | 0.0629 |
| 7  | 1.6648 | 0.4375 | 57 | 2.8723 | 0.1719 |
| 8  | 1.6678 | 0.1473 | 58 | 2.8784 | 0.0205 |
| 9  | 1.6860 | 0.1904 | 59 | 2.8819 | 0.1107 |
| 10 | 1.7094 | 0.2121 | 60 | 2.8851 | 0.1173 |
| 11 | 1.7274 | 0.1059 | 61 | 2.8974 | 0.3176 |
| 12 | 1.7409 | 0.0808 | 62 | 2.9061 | 0.0654 |
| 13 | 1.7480 | 0.0720 | 63 | 2.9103 | 0.1531 |
| 14 | 1.7627 | 0.0637 | 64 | 2.9153 | 0.3690 |
| 15 | 1.7712 | 0.3851 | 65 | 2.9288 | 0.7331 |
| 16 | 1.7839 | 0.0242 | 66 | 2.9398 | 0.0703 |
| 17 | 1.7972 | 0.0704 | 67 | 2.9509 | 0.1850 |
| 18 | 1.7991 | 0.2164 | 68 | 2.9636 | 0.0633 |
| 19 | 1.8382 | 0.5862 | 69 | 2.9665 | 0.2949 |
| 20 | 1.8470 | 0.2913 | 70 | 2.9817 | 0.3608 |
| 21 | 1.8575 | 0.7558 | 71 | 2.9863 | 0.8221 |
| 22 | 1.9204 | 0.0826 | 72 | 2.9870 | 0.3263 |
| 23 | 1.9314 | 0.4908 | 73 | 2.9897 | 0.0047 |
| 24 | 1.9381 | 0.5508 | 74 | 2.9939 | 0.2088 |
| 25 | 1.9739 | 0.6781 | 75 | 3.0003 | 0.7108 |
| 26 | 2.0074 | 0.1961 | 76 | 3.0091 | 0.2130 |
| 27 | 2.0538 | 0.0156 | 77 | 3.0516 | 0.1760 |
| 28 | 2.0890 | 0.0007 | 78 | 3.0593 | 0.3072 |
| 29 | 2.5310 | 0.1365 | 79 | 3.0713 | 0.2209 |
| 30 | 2.5558 | 0.1102 | 80 | 3.0770 | 0.3154 |



|    |        |        |     |        |        |
|----|--------|--------|-----|--------|--------|
| 31 | 2.5688 | 0.1984 | 81  | 3.0892 | 0.1523 |
| 32 | 2.5784 | 0.6090 | 82  | 3.0976 | 0.1434 |
| 33 | 2.6112 | 0.0272 | 83  | 3.1064 | 0.0450 |
| 34 | 2.6265 | 0.0589 | 84  | 3.1179 | 0.1905 |
| 35 | 2.6318 | 0.3687 | 85  | 3.1275 | 0.2305 |
| 36 | 2.6698 | 0.3002 | 86  | 3.1363 | 0.1977 |
| 37 | 2.6767 | 0.3787 | 87  | 3.1508 | 0.0801 |
| 38 | 2.6916 | 0.1605 | 88  | 3.1615 | 0.1949 |
| 39 | 2.6987 | 0.1204 | 89  | 3.1707 | 0.1137 |
| 40 | 2.7119 | 0.0972 | 90  | 3.1732 | 0.3995 |
| 41 | 2.7222 | 0.2511 | 91  | 3.1769 | 0.0496 |
| 42 | 2.7315 | 0.1578 | 92  | 3.1849 | 0.8908 |
| 43 | 2.7388 | 0.1976 | 93  | 3.2207 | 0.3660 |
| 44 | 2.7459 | 0.0126 | 94  | 3.2360 | 0.3065 |
| 45 | 2.7634 | 0.1408 | 95  | 3.2549 | 0.8574 |
| 46 | 2.7758 | 0.3104 | 96  | 3.2569 | 0.2383 |
| 47 | 2.7810 | 0.1238 | 97  | 3.2645 | 0.4785 |
| 48 | 2.7830 | 0.2414 | 98  | 3.2713 | 1.1708 |
| 49 | 2.7963 | 0.1910 | 99  | 3.2739 | 0.9560 |
| 50 | 2.8030 | 0.1075 | 100 | 3.2755 | 0.1479 |

## References

1. Sheldrick, G.M. (2008). *Acta Cryst.* A64, 112-122.
2. Dolomanov, O.V., Bourhis, L.J., Gildea, R.J, Howard, J.A.K. & Puschmann, H. (2009), *J. Appl. Cryst.* 42, 339-341.
3. Bourhis, L.J., Dolomanov, O.V., Gildea, R.J., Howard, J.A.K., Puschmann, H. (2013). in preparation
4. M. Dolg, H. Stoll, and H. Preuss, *J. Chem. Phys.* 90, 1730 (1989)
5. W. H. Melhuish, *J. Phys. Chem.*, 1961, 65, 229.
